# Supplementary material for: One Size Doesn’t Fit All: Using Factor Analysis to Gather Validity Evidence When Using Surveys in Your Research
Source: Atypon-hosted journal article supplement (doi:10.1187/cbe.18-04-0064), 2019-03-01
Supplement: cbe-18-04-0064-supplement_datasets.csv [file cbe-18-04-0064-supplement_datasets.csv]

go1	go2	go3	go4	go5	go6	go7	go8	go9	go10	go11	go12	go13	go14	go15	go16	go17	go18	go19	go20	go21	go22	go23
1	1	7	1	1	7	7	7	7	7	7	5	1	1	4	3	5	1	3	5	4	1	1
1	1	1	3	4	7	5	2	5	7	7	7	5	1	1	1	1	1	1	1	1	1	1
1	1	5	7	1	7	7	1	7	5	4	4	7	1	7	7	6	1	1	1	7	2	1
5	2	7	7	2	7	7	1	7	7	1	6	7	1	4	1	4	6	5	6	4	2	1
7	4	5	7	3	6	3	5	2	4	6	7	6	6	7	7	4	3	4	4	2	3	3
3	4	7	7	2	7	7	4	3	7	7	7	7	7	3	1	3	7	7	7	7	5	1
1	1	2	7	4	7	4	1	4	7	5	3	4	3	2	1	3	4	5	1	2	3	1
2	7	7	6	3	7	7	7	6	7	7	7	6	1	6	2	2	2	7	5	6	7	5
1	4	7	7	5	7	1	1	1	7	3	6	7	7	7	7	6	3	5	6	7	7	7
1	1	4	7	3	6	5	4	3	2	3	4	4	3	5	3	3	1	1	3	5	4	7
1	1	7	7	1	1	4	1	4	7	5	7	7	6	7	7	7	7	7	7	7	1	1
1	5	5	3	2	3	3	1	4	5	5	5	6	3	3	2	2	2	6	5	2	2	1
7	7	7	7	5	4	3	7	2	7	7	2	7	4	2	2	2	4	3	4	5	3	2
2	4	6	5	1	7	5	2	6	7	7	5	5	3	7	3	7	6	4	7	7	1	3
4	6	4	6	4	4	3	6	5	6	5	5	7	6	5	1	4	2	6	4	5	4	1
1	2	2	7	5	7	6	4	3	4	5	6	6	7	7	7	6	4	6	6	6	3	5
7	1	5	7	1	4	4	3	4	7	7	7	7	1	7	7	7	7	5	7	7	5	1
3	7	7	6	7	7	3	2	6	7	4	6	7	2	4	4	3	5	3	4	4	1	2
6	7	7	4	5	4	2	7	7	7	5	3	7	7	6	7	5	5	4	4	6	3	6
1	5	7	7	3	7	7	4	7	7	1	7	7	7	6	7	5	2	5	6	7	2	7
4	7	7	7	3	7	6	6	7	7	1	7	5	6	7	7	7	2	4	5	6	2	7
2	7	5	6	3	4	5	4	5	5	3	6	6	6	7	4	4	5	4	7	4	7	3
1	5	7	6	2	5	4	2	5	5	2	5	7	5	7	3	4	3	3	4	6	4	5
4	4	7	6	6	4	4	7	3	3	1	5	6	4	7	7	6	7	7	6	7	5	6
6	4	5	3	4	6	6	3	3	7	5	7	4	5	6	4	4	4	3	5	6	3	1
1	3	3	5	2	4	3	5	3	5	4	3	6	1	7	6	4	5	4	7	7	2	2
4	4	5	7	5	3	4	5	2	6	4	4	6	7	7	7	6	6	7	2	6	5	7
2	2	4	6	3	3	2	2	2	3	2	5	2	5	7	7	7	7	7	7	7	4	7
2	1	7	6	3	7	6	4	2	6	4	5	5	2	3	2	2	2	4	2	2	1	2
5	4	7	7	6	6	4	5	4	7	6	6	7	4	5	7	6	4	5	1	3	1	2
1	1	5	7	1	3	2	1	1	7	3	3	5	1	7	7	7	4	7	7	7	1	5
3	7	7	7	7	7	7	7	7	7	4	7	7	4	4	4	1	4	7	4	4	7	4
5	5	7	4	7	6	4	6	6	7	4	7	6	3	4	6	7	6	7	5	6	4	3
2	3	4	4	2	5	4	2	3	7	7	5	4	6	4	2	3	4	5	4	3	2	4
3	4	5	7	4	7	7	4	4	4	5	7	7	5	4	6	6	5	7	4	7	7	6
5	4	4	5	1	5	5	3	4	6	6	6	5	3	7	7	7	3	7	7	7	7	1
4	4	7	4	5	6	4	4	6	7	5	6	2	2	5	6	6	5	3	5	5	3	3
3	7	7	5	7	5	7	5	5	7	6	4	5	5	4	6	5	3	7	2	4	6	4
2	4	6	7	5	5	3	4	4	5	6	7	5	2	7	5	3	7	7	5	7	5	2
3	5	3	3	3	4	4	5	4	5	7	4	3	5	3	3	3	3	5	3	3	7	1
4	3	7	7	5	4	6	6	5	6	7	2	6	2	6	7	7	4	5	4	5	3	7
3	1	3	5	2	4	3	3	3	5	6	4	5	6	7	7	7	3	3	6	6	3	2
7	5	7	4	5	6	4	3	7	7	4	7	4	5	7	7	6	6	5	6	7	7	7
4	6	7	7	4	6	7	5	7	7	3	7	6	1	3	2	2	2	3	3	3	2	2
2	3	5	6	1	6	6	1	5	5	5	5	6	1	5	5	1	6	5	4	5	3	1
4	3	4	5	4	6	6	3	5	5	7	2	5	3	6	7	5	7	7	5	7	7	4
1	1	7	6	6	7	7	6	4	7	6	7	7	2	7	7	7	7	7	7	7	6	5
5	7	7	6	2	6	7	4	7	7	3	4	4	3	7	6	6	6	7	6	7	5	4
4	3	6	7	4	4	4	4	5	7	6	4	7	3	5	6	2	5	7	4	5	7	2
3	4	7	4	4	6	6	5	7	7	7	4	5	1	4	5	4	6	7	5	4	6	1
3	2	6	7	4	5	4	5	5	4	6	5	7	2	5	4	5	7	5	4	6	4	6
2	2	4	6	2	2	2	1	1	4	3	6	3	2	7	7	6	7	6	5	7	4	7
4	2	5	7	2	5	6	2	5	5	2	7	6	2	5	7	3	4	4	4	4	4	5
3	5	7	5	6	3	2	5	2	7	6	3	5	4	7	6	5	5	6	6	6	3	1
4	5	6	4	2	5	1	4	1	4	4	4	5	3	6	5	6	5	6	6	5	4	3
2	3	7	7	3	7	3	4	2	7	3	4	7	1	7	7	7	7	7	7	7	4	4
4	6	7	7	6	7	5	4	7	7	7	6	4	5	5	5	5	3	3	4	3	2	6
5	4	6	6	6	4	7	5	4	7	5	7	5	1	5	5	5	4	4	5	7	5	4
3	2	7	7	4	4	6	4	5	7	4	7	7	4	6	7	7	7	7	6	4	6	1
4	5	4	7	6	7	3	5	4	7	7	6	6	2	7	7	7	7	6	7	7	5	7
5	7	6	7	3	7	4	5	7	7	6	5	7	5	6	4	4	7	7	5	5	2	4
3	3	5	7	4	4	3	3	3	5	4	5	7	6	5	6	6	3	2	5	4	5	6
4	2	5	7	2	4	7	3	4	5	3	6	7	4	4	6	7	5	5	4	5	4	4
7	5	7	7	5	5	6	6	6	7	6	6	6	6	5	6	3	6	5	5	7	7	1
3	5	5	7	7	7	7	3	5	4	5	7	7	4	5	6	6	5	5	6	5	2	6
7	7	7	4	6	7	7	7	6	7	7	5	4	5	6	7	7	6	7	7	6	6	1
2	4	6	5	1	7	6	2	4	5	5	4	6	2	3	3	1	2	4	3	3	3	3
2	4	7	6	4	6	6	2	2	7	7	6	5	3	6	5	6	5	5	4	4	1	2
3	4	5	5	5	6	6	3	6	7	4	5	5	4	6	7	4	7	7	3	5	4	1
4	3	6	7	6	7	7	4	7	7	4	7	5	4	4	4	5	4	5	1	4	6	4
1	5	7	7	4	6	4	2	5	7	2	4	7	2	7	7	7	3	6	6	7	4	4
5	4	7	7	5	7	4	3	2	7	7	7	6	4	7	7	7	7	7	7	7	7	1
3	5	7	7	2	7	4	3	2	5	2	4	5	5	7	7	7	5	7	7	7	6	5
6	6	7	7	7	7	7	4	7	7	7	7	7	1	4	4	3	5	6	4	6	5	6
2	4	6	6	2	6	5	5	4	7	2	6	7	2	7	5	6	3	6	7	7	6	6
4	6	7	7	7	7	7	4	6	6	5	7	7	3	7	5	4	5	7	3	7	6	2
4	6	6	7	5	5	4	3	2	7	7	6	7	4	5	3	3	4	6	5	6	4	6
4	4	5	4	4	4	6	4	2	6	4	5	5	4	5	6	3	4	4	2	4	3	2
1	6	6	7	3	5	6	2	3	6	4	6	5	4	7	5	6	5	6	4	7	2	7
3	3	7	7	1	5	3	1	2	4	4	5	6	3	7	7	7	5	5	7	7	4	7
6	4	6	6	5	4	3	6	5	7	7	4	7	6	3	5	4	3	5	3	4	3	4
5	7	5	7	4	6	4	4	4	7	5	6	7	5	5	3	3	5	6	2	5	3	2
6	4	7	7	6	7	6	6	7	6	6	7	5	4	7	6	7	7	6	4	7	6	2
2	4	7	7	4	4	4	6	6	7	6	7	7	2	7	5	7	7	6	6	7	5	6
4	6	7	7	3	7	7	4	3	6	5	6	4	3	6	5	4	7	7	6	7	5	6
2	3	6	4	3	4	4	3	6	6	4	3	6	4	7	7	5	6	7	6	6	6	6
2	4	6	6	6	7	7	3	7	7	4	7	7	5	4	4	3	6	5	4	6	3	1
4	6	6	6	4	4	5	4	6	6	7	5	6	5	7	6	7	4	6	4	6	1	7
4	6	7	5	5	5	6	5	7	4	5	5	7	6	7	7	7	6	7	5	7	4	4
5	5	7	7	4	7	2	4	4	7	7	7	7	7	7	7	6	7	7	7	7	6	7
2	2	5	7	3	5	5	4	6	6	2	5	4	4	6	7	7	3	5	6	7	5	6
5	5	6	7	4	5	4	4	3	5	4	4	6	5	6	3	4	3	4	5	4	4	5
5	4	7	6	2	7	7	4	4	5	3	5	6	6	6	5	7	5	5	6	5	3	5
3	4	5	5	6	6	5	5	7	4	5	6	7	4	7	7	7	4	7	7	7	7	5
7	3	7	7	3	7	5	2	7	7	5	7	7	6	6	6	6	5	4	6	6	4	3
5	6	7	7	6	7	6	7	6	7	4	7	6	1	6	7	6	3	5	5	5	5	4
3	3	6	6	4	5	5	3	5	3	5	5	6	6	7	7	7	5	6	7	7	3	7
2	5	6	5	2	7	5	5	2	4	5	5	6	5	7	7	7	5	6	7	7	5	7
7	6	7	7	5	5	6	5	5	7	5	6	7	6	6	5	5	3	2	5	5	4	7
5	6	5	7	2	5	4	4	2	7	4	5	7	5	7	7	7	7	6	7	7	7	7
2	5	6	6	3	4	5	4	3	4	2	7	7	3	7	7	6	7	7	6	7	6	2
3	5	5	6	4	5	6	6	5	6	1	6	7	6	6	5	5	6	6	6	5	5	4
5	6	7	5	3	7	7	6	6	7	6	7	6	2	4	4	5	6	7	4	4	5	3
1	1	4	6	3	3	5	1	4	4	4	6	6	3	6	6	4	6	5	5	6	5	2
3	6	7	7	5	7	5	5	3	6	5	7	7	5	7	7	6	7	7	4	7	7	1
7	5	6	5	7	6	7	3	6	7	6	7	7	6	7	5	6	6	7	5	7	7	6
3	3	6	5	1	7	7	1	4	7	4	5	5	3	7	7	7	7	6	7	7	3	5
3	5	7	7	4	6	7	4	7	7	2	7	7	4	4	5	5	5	6	3	4	6	1
3	5	6	6	5	5	4	3	4	6	7	4	5	3	7	6	5	4	6	3	7	6	7
2	3	7	7	4	7	6	2	7	6	5	6	7	7	7	7	5	6	7	6	6	5	1
5	5	7	7	7	7	5	5	7	6	5	5	5	6	4	4	5	6	6	6	5	5	7
5	2	7	7	7	7	4	4	6	7	6	7	7	6	7	7	7	7	7	5	7	6	7
4	4	7	5	2	7	7	5	6	6	4	7	7	4	7	7	7	3	4	7	7	6	5
3	2	7	7	5	7	7	2	7	7	6	7	7	1	7	7	7	5	7	7	7	7	7
2	5	4	7	3	6	5	2	4	7	6	6	7	5	7	7	7	7	7	6	7	6	7
5	3	6	6	3	4	3	5	4	6	5	5	6	3	4	5	3	4	4	3	6	5	2
4	4	6	7	2	6	7	5	7	5	3	7	7	7	7	6	6	6	7	5	6	6	3
6	7	7	5	5	5	7	7	5	7	7	6	7	5	6	6	5	5	7	6	7	4	1
3	5	7	7	4	5	5	4	7	7	5	7	7	1	7	7	7	4	4	7	7	6	7
3	4	7	5	3	7	4	4	5	7	4	6	5	3	7	7	7	3	4	6	6	6	7
7	3	7	6	4	7	6	6	7	7	7	7	6	4	6	7	6	5	7	5	5	4	5
2	6	7	7	3	7	7	7	6	7	6	5	7	5	7	7	7	6	5	7	7	4	4
6	5	5	4	4	4	4	4	4	7	5	4	5	4	7	5	6	6	6	6	7	7	3
2	5	5	7	5	5	5	5	3	7	6	5	5	3	7	6	7	7	5	7	7	5	7
5	6	6	6	5	4	6	5	4	7	6	4	5	5	5	4	5	3	3	3	5	4	7
2	4	5	7	4	6	7	3	6	7	2	6	7	7	7	7	7	6	7	7	7	7	5
4	3	6	6	6	7	5	3	4	7	5	6	6	3	4	4	3	4	3	4	4	1	2
5	5	7	7	5	7	7	7	3	7	7	6	7	4	7	7	7	6	7	7	7	5	1
4	6	7	7	4	7	7	4	7	7	6	7	7	6	4	6	6	3	4	6	6	5	6
6	5	7	6	4	6	5	6	6	7	5	6	6	4	7	7	5	3	7	6	7	6	7
5	6	6	6	6	7	4	6	7	7	6	6	7	6	7	7	5	6	5	7	7	6	1
4	7	7	7	7	7	7	7	5	7	6	7	7	4	7	7	7	5	4	5	6	4	2
6	6	7	5	5	6	5	7	6	7	7	6	7	4	6	6	7	7	5	5	6	3	1
4	7	7	7	3	5	7	7	5	7	6	7	7	5	5	4	5	5	5	5	4	5	4
4	3	5	5	2	6	3	3	3	5	3	4	6	3	6	7	6	6	5	6	7	7	5
4	3	5	6	3	4	5	4	2	7	3	4	5	2	7	7	7	5	4	6	7	3	4
5	5	7	7	1	7	7	4	7	7	7	7	7	3	7	7	7	7	7	7	7	7	3
3	5	6	7	3	5	4	3	4	7	4	7	6	3	4	4	4	6	7	3	5	6	2
2	3	6	7	3	3	6	4	4	6	3	5	5	4	6	7	6	5	6	4	7	6	5
3	4	6	7	5	7	7	3	7	6	5	7	4	5	6	6	6	7	6	4	7	6	7
5	5	7	6	7	7	4	7	6	5	5	7	7	5	6	6	5	6	6	6	7	6	6
6	7	5	7	7	7	6	4	6	6	5	7	7	6	6	5	3	7	6	4	6	5	5
7	7	7	7	7	6	7	7	7	7	7	7	7	7	7	7	7	7	7	7	7	1	5
1	4	7	6	4	5	7	4	4	5	5	4	7	4	7	7	7	7	7	7	7	4	3
7	6	7	7	7	6	6	5	5	7	5	7	7	7	5	7	6	7	7	6	7	6	2
4	5	6	7	2	6	6	2	4	6	5	6	7	3	5	6	6	5	6	5	4	7	5
1	1	7	7	1	5	5	1	3	7	3	6	7	3	7	7	7	7	7	7	7	3	7
6	2	7	6	5	7	6	6	7	7	4	7	7	6	7	6	6	6	7	6	6	4	5
4	4	7	7	5	6	3	5	2	7	4	4	6	6	7	6	6	6	6	6	7	6	7
5	6	7	6	7	7	6	4	7	7	7	7	7	7	7	6	7	7	5	7	7	6	1
3	5	4	7	6	6	5	4	5	7	6	5	6	3	5	5	5	7	7	4	5	5	5
7	7	7	7	7	7	7	7	7	7	7	7	5	7	6	7	4	5	6	5	5	4	5
5	5	5	7	4	5	4	5	4	7	4	4	4	4	5	4	5	4	4	4	4	5	5
3	5	7	7	4	5	5	6	5	7	5	5	6	3	5	3	5	4	5	3	6	3	4
5	5	7	7	6	7	7	5	6	7	5	6	7	6	7	6	6	6	7	6	7	1	2
1	2	5	4	4	5	4	2	6	5	3	5	5	4	7	7	7	5	5	5	6	2	4
5	1	5	7	4	7	7	4	6	6	4	7	6	6	7	7	6	6	7	7	7	7	5
3	6	5	7	4	4	4	6	5	6	6	4	6	3	6	5	5	6	4	6	6	4	4
2	6	6	5	6	6	6	2	4	7	6	6	6	2	6	6	6	6	6	6	6	6	6
3	5	7	7	4	6	7	3	5	6	7	4	5	6	7	7	7	7	7	7	7	6	7
3	4	7	5	4	4	3	4	3	4	3	5	5	3	7	7	7	6	7	7	7	4	6
6	7	6	7	6	5	5	7	5	7	7	7	7	5	7	7	6	5	4	7	7	7	4
7	5	5	5	6	6	7	5	7	7	6	6	5	6	6	5	7	5	5	6	5	5	6
4	4	4	6	4	4	4	4	4	7	4	5	6	4	6	7	6	7	6	5	7	4	6
2	2	7	6	6	6	7	2	6	7	3	7	6	5	6	6	6	7	7	6	7	5	5
2	4	6	7	5	6	5	4	5	5	6	5	5	7	6	6	5	4	6	5	6	7	6
3	7	7	7	4	6	4	6	5	7	4	7	6	3	7	5	6	6	7	6	6	5	4
4	3	5	6	2	5	5	3	4	5	5	5	6	4	6	5	5	4	7	3	5	7	4
3	5	5	7	5	7	5	4	4	5	5	6	5	5	6	5	3	5	5	5	5	6	7
5	5	5	6	6	5	5	3	5	6	5	3	6	3	6	5	5	6	7	4	5	4	4
4	7	7	7	4	4	6	5	5	7	7	4	7	7	7	7	7	7	7	6	7	4	4
7	4	7	7	5	7	7	5	6	7	5	6	7	7	6	6	5	6	5	6	7	4	1
4	4	6	7	3	5	4	4	7	7	5	4	6	6	7	7	7	6	6	7	6	4	3
2	6	7	6	2	7	7	3	6	7	5	7	7	7	7	7	7	7	7	7	7	4	5
4	7	7	7	7	7	7	4	7	6	6	7	7	6	7	7	7	7	4	7	7	5	6
5	7	6	6	6	6	7	2	6	6	6	7	6	6	6	7	7	6	6	6	6	6	2
3	4	6	6	4	4	4	5	5	6	6	7	6	5	5	6	5	4	6	5	5	4	1
4	4	6	6	4	5	5	5	4	6	6	6	6	3	5	6	4	4	6	4	7	6	7
7	6	7	7	7	6	6	5	7	7	7	7	6	6	7	6	7	6	7	4	5	6	6
4	5	5	7	5	5	4	3	3	5	5	5	5	6	7	7	6	5	7	7	7	4	4
1	5	7	6	5	6	5	4	5	7	4	7	6	5	7	5	6	6	5	6	6	6	4
5	5	6	6	4	6	6	4	7	7	7	5	7	4	6	4	5	4	4	4	4	3	3
5	6	5	6	6	4	6	4	5	6	7	6	4	4	6	6	6	7	7	6	6	7	4
4	5	7	6	5	6	7	1	7	7	5	7	5	5	6	5	6	6	6	6	6	5	5
5	3	7	6	3	7	7	5	7	7	4	6	5	4	5	6	6	6	7	5	6	5	3
6	7	7	7	5	6	4	6	6	7	7	6	7	5	4	6	4	6	6	4	5	6	3
6	5	7	7	6	7	7	5	4	7	7	5	6	5	7	7	7	5	4	7	7	5	5
3	3	5	7	3	5	4	4	4	6	3	5	4	4	5	5	6	6	7	5	6	4	5
5	4	6	7	4	4	6	4	5	7	6	6	4	4	5	6	6	5	5	4	4	4	4
2	3	4	4	2	5	4	2	5	5	4	5	4	4	4	5	4	4	4	5	5	2	3
5	7	7	7	7	7	6	6	7	7	6	7	7	7	6	7	6	5	7	4	7	4	7
4	4	7	5	7	5	6	6	6	7	6	7	7	6	7	7	7	7	6	6	6	5	6
3	3	7	7	4	7	7	3	7	7	5	6	7	5	5	4	4	6	5	4	6	5	1
4	6	7	6	6	7	7	4	4	7	5	4	7	4	7	7	6	7	7	6	7	6	4
4	4	7	6	3	6	6	3	6	6	5	5	5	6	4	4	5	4	3	4	4	3	2
3	4	6	5	4	4	5	4	5	6	5	7	5	6	6	5	6	5	7	6	6	5	2
3	3	5	6	2	5	6	2	3	4	2	5	4	3	5	6	6	4	5	4	5	3	3
4	5	6	6	5	4	5	5	5	6	5	5	6	5	4	2	4	4	5	3	3	4	3
3	4	5	6	3	5	4	5	4	6	3	3	5	4	5	5	5	6	6	5	5	3	6
2	3	7	5	3	6	5	2	4	7	4	7	6	3	7	7	7	7	6	7	7	3	7
5	7	7	7	4	7	7	5	7	7	4	7	7	5	4	4	4	5	4	4	4	5	1
3	5	7	7	5	5	5	2	5	7	5	5	7	4	6	6	6	6	5	4	7	3	4
2	3	7	7	4	5	5	6	4	7	6	6	7	6	6	6	6	7	6	6	6	5	4
3	7	7	6	7	7	7	6	7	7	7	7	7	5	6	6	6	4	5	6	6	3	7
4	6	7	7	4	7	7	3	7	7	5	7	7	5	7	7	6	4	7	4	7	5	5
3	4	5	5	3	7	7	3	6	6	5	4	6	3	7	7	7	5	7	7	7	6	6
6	6	6	7	6	7	6	5	6	7	5	6	7	2	7	6	5	7	7	7	7	6	3
4	4	5	5	5	4	3	3	2	5	3	5	4	5	5	4	4	3	4	4	5	3	3
5	4	6	6	4	6	6	5	4	5	5	5	6	4	4	6	5	5	4	4	4	2	2
5	7	7	7	7	7	7	7	7	7	7	7	7	4	7	5	7	6	6	7	6	6	7
3	6	7	7	6	5	6	4	6	7	4	5	7	3	6	7	6	5	7	7	7	5	6
6	6	7	7	7	7	7	6	5	7	7	6	7	6	6	6	5	5	6	5	7	7	1
3	4	6	5	5	4	4	6	4	6	6	4	6	4	5	6	5	4	4	5	6	5	6
2	2	5	5	2	3	4	2	3	5	3	5	5	4	7	7	7	5	4	5	7	4	6
4	4	4	4	4	4	4	4	4	4	6	4	4	4	4	3	4	4	4	4	4	4	2
5	5	7	6	3	4	4	5	5	7	4	4	6	5	6	5	4	6	5	6	6	4	5
3	5	7	7	4	6	7	5	6	7	7	7	7	4	5	5	5	6	4	4	5	3	2
5	3	4	4	4	5	5	4	5	5	5	4	4	4	6	6	5	5	5	5	5	5	1
6	7	7	7	5	5	7	7	5	7	7	5	7	5	5	5	6	6	7	5	6	7	6
4	4	5	6	4	5	6	3	4	7	5	6	5	4	7	6	7	4	4	5	6	5	3
6	7	7	7	7	5	7	7	7	7	6	7	7	6	7	5	7	6	7	6	7	6	5
4	3	7	7	4	5	5	3	5	7	7	7	6	6	7	6	7	6	6	6	7	4	3
4	2	7	7	5	4	5	4	4	7	5	6	7	3	7	7	7	6	5	6	7	3	6
4	5	6	6	6	4	5	4	4	7	6	6	6	6	6	6	6	5	7	4	6	5	2
6	6	7	5	7	7	7	6	7	6	5	7	6	5	7	6	6	5	7	6	6	7	7
4	3	7	7	6	7	6	4	7	7	6	5	7	4	7	6	7	5	6	6	7	4	7
5	7	6	5	7	7	7	5	7	6	6	7	7	5	7	6	6	7	6	5	7	6	5
6	6	6	7	5	6	6	4	6	7	4	6	7	5	7	7	5	6	6	5	7	7	3
4	5	7	6	4	7	5	6	6	7	5	7	7	6	7	7	6	5	6	5	7	5	7
5	5	7	7	6	4	4	5	6	7	4	7	7	5	7	7	7	7	7	7	7	7	7
5	5	6	6	4	7	6	5	6	6	4	7	7	3	5	5	4	6	6	6	6	6	6
5	4	6	6	5	5	3	4	5	7	5	7	5	5	7	7	6	6	7	7	7	6	6
4	4	6	7	2	5	7	3	3	7	5	6	7	4	7	7	7	7	7	7	7	6	6
6	6	6	7	6	6	6	5	6	6	6	5	7	7	5	5	5	6	7	4	5	5	1
5	5	5	7	4	6	6	5	6	7	5	6	5	6	6	6	5	6	7	6	5	6	5
4	5	6	7	4	6	6	4	6	6	6	6	6	6	6	6	3	5	5	5	6	5	4
2	4	5	5	2	4	2	4	4	5	4	5	5	3	6	6	5	6	5	5	6	3	4
5	6	7	7	4	5	6	6	5	7	6	7	7	6	5	5	5	6	6	5	6	7	7
4	5	6	6	3	7	5	4	5	6	5	5	5	6	7	7	7	5	7	5	7	6	6
3	3	7	7	4	7	5	2	5	7	4	7	6	3	7	6	6	6	7	5	7	4	3
7	7	7	7	6	7	6	6	7	7	5	7	6	5	7	7	7	7	5	6	7	4	6
3	6	7	7	5	6	5	3	5	6	5	6	6	4	6	5	5	7	6	5	6	5	1
4	6	7	7	6	6	7	6	6	7	7	5	6	7	7	7	6	6	6	7	6	5	6
4	4	6	6	4	6	6	4	5	7	6	4	6	4	5	7	6	4	5	5	5	5	6
5	6	7	7	5	5	5	5	5	7	7	5	6	5	7	7	6	4	6	4	6	4	6
5	7	7	7	6	7	6	5	7	7	6	7	7	6	7	7	7	5	7	5	5	5	5
4	6	7	7	6	7	6	4	6	7	6	7	6	4	6	5	6	4	6	6	6	7	3
5	6	7	7	5	7	5	6	4	7	6	7	6	5	7	5	6	6	7	6	6	6	6
3	5	7	6	4	7	5	5	3	6	5	6	6	3	7	7	7	5	7	6	7	4	5
5	6	6	6	6	7	7	6	6	7	4	5	6	6	6	5	5	6	7	6	6	5	4
4	4	4	4	4	4	4	4	4	4	4	4	4	4	4	4	4	4	4	4	4	4	4
4	5	6	6	4	5	4	4	5	7	6	6	6	6	6	6	5	6	7	7	5	5	4
5	5	5	5	5	6	5	5	6	6	5	6	5	4	6	6	5	7	6	5	5	6	1
4	3	6	5	4	5	5	3	5	7	5	5	6	2	7	6	7	6	5	6	7	5	4
5	5	5	5	5	4	6	5	4	5	5	4	5	4	6	6	5	5	5	4	6	4	5
5	5	5	7	5	6	7	4	6	5	7	6	6	5	5	5	5	5	6	5	5	5	6
4	4	4	6	6	6	6	4	5	5	5	5	5	4	7	7	6	6	6	7	7	6	6
4	5	5	5	5	4	4	5	4	5	6	4	4	4	4	4	4	4	4	4	5	4	5
5	5	7	6	4	5	5	4	5	5	6	6	5	6	7	7	7	7	7	7	7	6	6
4	6	7	6	6	7	7	4	6	7	6	6	7	5	6	6	6	4	7	5	5	5	6
4	5	6	7	6	6	7	4	7	7	6	6	6	4	7	7	7	6	7	7	7	3	4
6	6	7	7	5	7	7	5	5	7	5	6	7	7	7	6	7	5	7	7	7	5	4
4	5	5	6	3	5	6	4	6	6	6	5	5	4	5	5	5	4	6	4	5	5	1
5	7	7	7	7	6	6	4	5	7	6	7	7	7	7	7	7	5	6	5	6	5	4
5	4	7	7	7	5	6	4	7	7	7	6	7	5	7	7	7	7	7	7	7	5	5
6	6	6	7	4	6	7	4	5	7	5	7	5	5	7	7	7	6	6	6	6	6	5
3	4	6	4	3	4	4	3	5	6	4	4	5	4	6	5	5	4	6	5	6	4	4
4	4	6	5	4	4	4	4	4	6	4	5	4	4	7	7	7	7	7	7	7	6	7
5	6	7	7	5	5	7	5	5	7	5	5	7	5	7	7	7	7	7	7	6	7	5
4	4	5	6	4	6	5	3	5	6	4	5	6	5	7	5	4	5	6	6	6	4	4
5	7	7	7	3	7	6	5	6	7	7	7	7	5	7	7	6	6	7	7	7	7	4
5	7	6	6	7	7	7	5	5	6	7	7	5	5	7	7	7	7	7	7	7	5	7
7	7	7	7	7	7	7	7	5	7	5	7	6	6	7	7	7	6	6	7	7	5	7
6	4	7	7	7	7	7	5	7	7	5	7	7	6	7	7	7	5	5	7	7	5	7
5	4	6	5	6	6	5	6	7	7	5	6	5	5	5	5	5	6	6	5	5	4	4
7	7	7	7	7	7	7	7	4	7	7	7	7	7	7	7	7	7	7	7	7	7	5
5	7	6	7	4	7	7	6	6	6	5	6	7	6	7	7	7	7	6	6	7	6	6
5	7	7	7	4	7	7	7	6	7	7	7	7	6	7	7	6	6	7	7	7	7	7
4	6	7	7	6	7	5	5	5	7	7	7	7	6	7	7	6	6	6	5	6	5	7
6	7	7	7	6	7	7	6	7	7	7	7	7	7	7	7	7	7	7	6	7	3	7
6	7	7	7	7	6	7	6	5	7	7	7	7	5	7	7	7	5	6	7	7	4	7
5	7	7	7	4	7	7	7	6	7	7	7	7	7	7	7	7	6	7	7	7	7	6
4	5	6	6	4	6	5	4	6	7	5	5	7	5	6	4	6	5	6	6	6	5	4
5	6	7	7	7	7	6	4	7	7	7	7	7	7	7	7	7	5	6	7	7	7	6
4	5	7	7	3	5	6	4	6	6	5	6	6	4	7	6	7	7	7	6	7	5	3
4	4	5	6	4	4	4	4	4	4	5	5	5	4	6	6	6	5	6	6	6	5	4
4	4	6	5	5	5	5	3	4	6	4	6	6	6	5	4	5	4	5	5	5	4	4
6	6	7	6	6	6	5	6	5	6	7	6	6	6	7	7	7	5	7	6	7	6	4
6	6	7	7	6	5	5	6	5	7	6	7	7	7	6	6	7	7	7	6	7	5	7
6	5	6	7	7	7	7	5	7	6	4	7	7	7	7	7	7	7	7	7	7	7	7
5	6	7	6	6	5	5	6	5	6	4	5	7	5	7	7	6	7	6	6	6	5	4
4	6	6	7	5	5	5	4	6	7	5	5	7	5	7	7	7	5	7	7	7	5	7
3	5	7	7	5	6	6	4	4	7	6	6	7	4	6	7	7	7	7	5	6	6	3
5	6	7	6	7	5	7	5	5	7	7	7	7	5	7	7	7	6	6	7	7	5	5
5	5	7	7	6	7	6	6	4	7	6	7	6	6	6	6	7	7	7	6	7	6	6
5	4	7	7	4	6	4	5	6	7	5	7	7	5	6	6	6	5	6	5	6	6	5
5	6	7	7	5	7	7	5	4	7	7	5	6	5	7	7	7	7	7	7	7	6	6
4	5	4	5	5	6	5	5	5	5	5	5	6	5	6	6	6	5	5	6	6	4	5
3	4	5	5	4	5	3	4	4	5	5	4	6	4	5	5	4	5	6	5	5	5	5
4	5	6	6	4	6	4	6	5	6	6	6	6	5	5	5	5	5	5	4	4	5	2
6	5	7	7	3	7	7	4	5	7	5	7	7	6	6	6	5	5	6	6	6	5	4
5	5	7	7	4	5	6	5	5	6	6	5	6	6	7	7	7	5	5	7	7	4	6
5	6	7	7	7	7	7	6	7	7	7	7	7	7	7	7	6	5	7	7	7	7	7
7	7	7	7	7	6	7	6	7	7	7	7	7	7	7	6	5	6	6	6	7	6	5
6	6	6	6	5	6	6	5	5	7	7	5	7	5	6	6	5	5	7	5	6	4	4
4	5	6	7	5	6	5	5	5	6	6	5	5	4	7	7	7	6	6	5	6	6	4
7	6	7	7	5	6	7	5	6	7	7	7	6	5	7	7	6	7	6	7	7	5	6
3	3	7	7	3	6	6	4	5	7	5	7	7	4	7	7	7	5	7	7	7	5	7
4	6	7	7	5	6	5	4	5	6	5	6	7	7	7	7	7	7	7	6	7	7	7
3	6	6	6	4	5	6	4	5	6	6	5	5	3	7	7	7	6	7	7	7	6	7
4	6	6	7	4	6	6	6	6	7	6	6	7	5	7	6	7	7	7	7	7	7	6
4	5	7	7	6	5	5	6	5	7	6	5	6	6	7	7	7	7	7	7	7	7	5
5	7	7	7	5	7	7	4	6	7	5	7	7	7	7	7	7	7	6	7	7	4	6
6	6	7	6	6	5	7	5	7	7	6	7	7	5	7	6	7	7	7	7	7	5	6
3	4	7	7	5	6	5	5	5	7	5	6	5	5	7	7	7	7	7	7	7	5	7
5	4	6	6	5	6	5	4	5	6	5	6	6	4	6	5	6	7	6	5	5	4	6
6	6	6	6	7	5	6	5	6	6	6	6	6	6	7	6	6	6	5	6	6	6	5
5	5	7	7	6	6	7	4	7	7	7	7	7	5	6	7	6	5	5	6	6	5	6
6	6	7	7	7	7	7	7	7	7	7	6	7	7	6	6	6	7	6	6	6	5	7
5	6	7	7	4	6	5	6	5	7	5	6	5	5	5	5	5	5	6	5	5	5	5
7	7	7	6	6	7	7	6	6	7	5	7	6	6	7	7	7	7	7	7	7	7	5
3	6	7	7	5	7	7	5	7	7	7	7	7	5	7	7	7	7	7	7	7	7	4
4	5	6	6	4	5	6	4	6	7	5	5	7	4	7	7	7	7	7	7	7	4	6
4	5	5	5	5	7	7	5	7	6	5	6	6	4	6	6	6	6	6	5	6	5	4
4	6	6	6	5	6	6	4	6	6	6	6	6	3	7	7	6	7	6	5	6	6	5
6	5	6	5	5	6	4	6	5	6	5	6	5	4	6	6	6	6	6	6	6	5	4
6	6	6	6	7	6	6	5	7	7	7	6	7	5	7	7	7	6	7	7	7	7	5
4	6	6	6	6	6	5	6	6	7	6	6	6	3	7	7	7	6	7	6	7	6	7
4	6	7	6	5	5	5	4	6	7	6	6	5	5	6	6	7	6	6	6	6	5	4
6	7	7	7	6	6	5	6	5	7	7	6	7	6	6	7	6	5	6	5	6	4	4
4	4	6	6	4	5	4	4	5	7	6	4	6	4	6	6	6	4	6	6	6	4	5
5	5	6	6	5	5	6	4	6	6	4	6	6	3	7	6	6	6	5	6	7	5	6
4	5	5	7	5	5	5	5	5	6	5	7	6	4	6	6	6	5	6	5	6	4	4
4	4	6	6	3	6	7	3	6	6	5	6	6	3	7	7	7	5	7	7	7	5	6
4	5	7	6	5	5	5	5	4	7	4	6	6	3	7	7	7	6	7	7	7	4	6
5	5	7	7	7	6	7	5	5	7	5	7	7	6	6	6	6	5	5	6	6	5	5
5	7	7	7	6	7	6	7	6	7	7	7	7	6	6	7	6	6	7	6	7	6	5
4	4	6	6	5	6	5	4	5	5	5	5	5	4	5	5	4	5	4	4	5	4	3
5	7	7	7	7	7	7	7	7	7	7	7	7	7	7	7	6	7	7	7	7	7	7
6	6	7	7	7	7	7	7	6	7	6	7	6	7	7	7	6	6	6	6	7	6	6
4	4	6	6	6	5	5	5	6	6	4	5	6	4	6	6	5	6	6	5	6	4	6
6	4	7	6	6	7	7	5	6	7	7	7	6	5	7	7	7	7	7	7	7	6	6
6	6	7	7	7	7	7	7	7	7	7	7	7	5	7	7	6	6	6	7	7	6	5
6	6	7	7	7	7	7	7	7	7	5	7	7	5	7	7	7	7	7	7	7	6	7
6	6	7	7	6	7	6	7	6	7	7	7	7	6	7	7	7	7	7	6	7	7	7
5	7	7	7	6	7	7	7	6	7	7	7	7	7	7	7	7	7	7	7	7	6	7
5	5	7	7	5	7	6	5	5	7	7	6	7	5	6	7	7	6	6	6	6	5	7
5	6	7	7	6	7	7	5	6	7	7	7	7	6	7	6	7	7	7	6	7	7	7
4	6	7	7	4	7	7	5	5	7	5	7	7	5	7	7	7	7	7	7	7	6	3
5	5	6	6	5	7	6	5	6	6	6	6	6	5	7	7	6	7	6	6	7	7	4
4	4	6	6	4	6	5	4	5	6	5	5	7	5	7	7	7	5	6	6	7	6	7
5	6	7	7	5	7	6	6	5	7	6	7	6	7	7	7	7	7	7	7	7	6	7
5	5	6	6	6	7	6	4	6	6	5	7	6	5	6	6	5	7	6	6	6	6	4
7	7	7	7	7	7	7	7	7	7	7	7	7	7	7	7	7	7	7	7	7	7	7
4	5	7	6	4	6	6	4	4	7	6	5	6	4	6	7	6	6	6	6	6	5	5
5	6	7	7	6	7	7	5	7	7	7	7	7	5	6	6	6	7	7	7	7	6	6
5	5	7	7	5	7	7	6	7	7	5	7	7	5	7	7	7	6	6	7	7	5	7
5	5	7	7	5	7	7	5	7	7	7	7	7	5	7	7	7	7	7	7	7	5	7
4	6	7	7	7	7	7	5	7	7	6	7	7	6	7	7	7	6	7	7	7	6	7
4	6	7	7	5	5	5	5	5	7	5	6	7	5	7	7	7	7	7	6	7	6	5
5	6	7	6	6	6	6	6	6	7	6	6	6	5	6	6	5	6	7	6	6	6	6
5	6	6	6	6	5	6	5	6	6	6	6	6	6	6	6	6	6	6	6	6	6	5
5	6	7	7	5	7	6	5	6	7	6	7	7	5	7	7	7	7	7	7	7	5	5
6	6	6	6	6	6	6	6	6	6	6	6	6	6	6	6	6	6	6	6	6	6	6
5	5	6	6	5	6	6	5	6	6	6	6	6	5	6	6	6	6	6	6	6	6	6
