# Supplementary material for: One Size Doesn’t Fit All: Using Factor Analysis to Gather Validity Evidence When Using Surveys in Your Research
Source: PubMed Central journal article supplement — CBE Life Sci Educ. 2019 Spring;18(1):rm1. doi: 10.1187/cbe.18-04-0064 (PMC6757227; doi:10.1187/cbe.18-04-0064), 2019
Supplement: cbe-18-rm1-s001.pdf [file cbe-18-rm1-s001.pdf]

# Supplemental Material

*CBE—Life Sciences Education*

Knekta *et al.*

1  
2  
3  
4  
5  
6  
7  
8  
9  
10  
11  
12  
13  
14  
15  
16  
17  
18  
19  
20  
21  
22  
23  
24  
25  
26  
27  
28  
29  
30  
31  
32  
33  
34  
35  
36  
37  
38  
39  
40  
41  
42  
43  
44

## Supplemental material

### Section 1. Checking properties of the data

Summary of the most essential analysis for checking the data for EFA/CFA purposes.

#### ***Missing values and outliers.***

Data should always be checked for missing values. Some statistical software cannot handle data with missing values. Yet, simply deleting participants with missing values has the potential to bias the results of any subsequent analysis. Participants with large percentages of missing values (e.g., > 90%) should always be considered for possible deletion, as these individuals may not have taken the survey seriously and imputing that much missing data can be problematic. In most other instances, best practice dictates that a missing data technique, such as full information maximum likelihood or multiple imputation (Enders, 2010), should be used to estimate missing values. If the number of missing values across the data set is relatively low (< 5%) and the data are deemed to be missing at random (i.e. there is no systematic reason for the missing responses<sup>1</sup>), the methods used for estimation of the missing values will have only a minor impact on the results (Tabachnick and Fidell, 2013). In these cases individuals with a few missing values might even be deleted, but if so, this should be reported and justified in the methods section of the manuscript. If the missing values are non-randomly distributed or if there is a substantial amount of missing data across participants, a missing data technique must be used in order to retain as much of the sample as possible.

Outliers can also have a large effect on the factor analysis, therefore the presence of both univariate and multivariate outliers have to be considered before performing factor analysis. Univariate outliers can be found by looking at descriptive statistics such as the minimum and maximum values for a survey items, as well as frequency histograms of the responses. Multivariate outliers can be screened for using, for example, Mahalanobis distance, leverage, and influence (Raykov and Marcoulides, 2008; Tabachnick and Fidell, 2013). On surveys, multivariate outliers are respondents having an unusual reply pattern. An example of a multivariate outlier that could be subject to deletion would be a respondent replying 1 to all items on a Likert scale, although some items are reverse-scored. This would indicate that the respondent was string responding (choosing the same response for all items), and thus not providing valid responses to the survey items.

#### ***Factorability.***

To be able to find or confirm factors within a data there first has to be, at least, a few sizeable correlations between individual items. This so-called factorability can be tested with Kaiser's measure of sampling adequacy, values of 0.6 and above are suggest good factorability (Tabachnick and Fidell, 2013). Also, an inter-item-correlation matrix should be used to visually inspect the data and confirm that there are numerous moderate to strong correlations among the items. The expected size of the correlation depends to some extent on the sample size, but inter-item correlations should at least exceed 0.30 if they are expected to be on the same factor (Tabachnick and Fidell, 2013).

---

<sup>1</sup>Whether the data is missing at random or not can be tested with the Little's Missing Completely at Random (MCAR) test<sup>1</sup>. It should be noted that Little's MCAR only tests the null hypothesis that the observed missing responses are consistent with MCAR missing data but cannot definitively show that the missingness is truly MCAR (Enders, 2010).

45 ***Normality and linearity.***

46 Univariate and multivariate normality within the data are preferable when performing factor  
47 analysis (Raykov and Marcoulides, 2008; Tabachnick and Fidell, 2013). Univariate normality  
48 can be assessed by measures of skewness and kurtosis. A graphical examination of a frequency  
49 histogram for each question can be helpful. A common guideline is that skewness and kurtosis  
50 should be less than  $|2.0|$  (Bandalos and Finney, 2010). Some researchers suggest a more liberal  
51 standard for kurtosis,  $< |7.0|$  (Bandalos and Finney, 2010). Mardia's multivariate normality test is  
52 one commonly available test for multivariate normality. Significant multivariate skewness or  
53 kurtosis values indicate multivariate non-normality. Factor analysis is a multivariate procedure  
54 and one can have multivariate non-normality even when all univariate statistics indicate that the  
55 data is normal.

56 Factor analysis is built on the analysis of the covariance matrix in the data and assumes  
57 linear relationships between items and between items and the factors (Raykov and Marcoulides,  
58 2008; Tabachnick and Fidell, 2013). Linearity can be checked by inspecting scatter plots  
59 between two variables or residual plots. If severe nonlinearity and or non-normality are found,  
60 transformation of variables can be considered. If moderate non-normality exists, polyserial or  
61 polychoric correlation coefficients or estimators robust against non-normality (for example MLR  
62 or PAF) can be considered. Non-linear factor analysis methods exist (Yalcin and Amemiya,  
63 2001), but are far less common.

64

65 ***Multicollinearity***

66 For factor analysis, it is important that the variables not are too highly correlated  
67 (multicollinearity). Multicollinearity can cause statistically unstable and unreliable results.  
68 Multicollinearity can be detected with the help of the variance inflation factor (VIF) or tolerance.  
69 If the VIF is above 10 or the value of tolerance is less than 0.1, multicollinearity is problematic.  
70 Multicollinearity can depend on two variables being too highly correlated (correlation  $>0.90$ ) or  
71 too many moderately high correlations over a number of items (too many items with correlations  
72  $> 0.70$ ). If multicollinearity is indicated, one or several of the variables that are too highly  
73 correlated should preferably be deleted.

74

75  
76  
77  
78  
79  
80  
81  
82  
83  
84  
85  
86  
87  
88  
89  
90  
91  
92  
93  
94  
95  
96  
97  
98  
99  
100  
101  
102  
103  
104  
105  
106  
107  
108  
109  
110  
111  
112  
113  
114  
115

***Example of how to analyze whether the data meet the assumptions for a factor analysis using Diekman's et al. (2010) goal endorsement example.***

*Missing values and outliers*

No items were missing more than 1.3% of their values and this missingness was at random (Little's MCAR test: Chi-Square = 677.719, df = 625, Sig. = 0.075 implemented with the BaylorEdPsych package; Beaujean, 2012). Thus, missing data should only have a minor impact on the results and missing data handling procedures would yield similar results. For the EFA, only cases with complete items were used in the analysis. For the CFA, we used full-information maximum likelihood in the estimation procedure to handle the missingness. Minimum and maximum values of the items were analyzed to ensure no univariate outliers. Thirty-eight (38) cases with high Mahalanobis distance ( $p < 0.001$ ) were identified as potential multivariate outliers. Each of the 38 cases were inspected in detail and we found no justification for removing any of the responses.

*Factorability*

The inter-item correlation matrix showed that there were several correlations above 0.3 and the Kaiser's measure of sampling adequacy value was 0.91 which indicated good factor ability. The Kaiser test was implemented using the psych package (Revelle, 2017) and correlations were visualized using corrplot package (Wei and Simko, 2017).

*Normality and linearity*

Most items had a skewness and kurtosis below  $|1.0|$  and all items had a skewness below  $|2.0|$  and kurtosis below  $|4.0|$ . In alignment with these tests, graphical examination of frequency histograms did indicate a slight negative skewness for some items. Thus, most of the items were univariate normal but some items showed slight non-normality. These same items showed some indications of non-linearity when regressed against other items and when examining standardized residual plots. Mardia's multivariate normality test (implemented with the psych package, Revelle 2017) showed significant multivariate skewness and kurtosis values which indicated multivariate non-normality. We employed robust estimation methods to handle non-normality and non-linearity, in subsequent factor analyses.

*Multicollinearity*

Multicollinearity was investigated by examining inter-item-correlations and tolerance values from multiple regressions implemented with the olsrr package (Hebbali, 2018). The highest inter-item correlation was 0.73 and the lowest tolerance was 0.36. Thus, the data did not show evidence of multicollinearity.

116 **References**

117

118 Bandalos, D. J. & Finney S. J. (2010). Factor analysis. Exploratory and confirmatory. In  
119 Hancock G. R., and Mueller R. O. (Eds), *The Reviewer's Guide to Quantitative Methods*  
120 *in the Social Science* (pp. 93 – 114). New York: Routledge.

121 Beaujean, A. A. (2012). BaylorEdPsych: R package for Baylor University Educational  
122 Psychology Quantitative Courses. Available from [https://CRAN.R-](https://CRAN.R-project.org/package=BaylorEdPsych)  
123 [project.org/package=BaylorEdPsych](https://CRAN.R-project.org/package=BaylorEdPsych). Retrived February 24, 2019

124 Diekman A. B., Brown E. R., Johnston A. M., & Clark E. K. (2010). Seeking congruity between  
125 goals and roles: A new look at why women opt out of science, technology, engineering,  
126 and mathematics careers. *Psychological Science* 21(8), 1051-1057.

127 Enders C. K. (2010). Applied missing data analysis. Guilford Press, New York

128 Hebbali, A. (2018) olsrr: Tools for building OLS Regression Models, version 0.5.1. Available  
129 from <https://cran.r-project.org/web/packages/olsrr>. Retrived February 24, 2019

130 Raykov, T. & Marcoulides G. A. (2008). *An Introduction to Applied Multivariate Analysis*. New  
131 York: Routledge.

132 Revelle, W. (2017) psych: Procedures for Personality and Psychological Research (Version  
133 1.7.8), Northwestern University, Evanston, Illinois, USA. Available from  
134 <https://CRAN.R-project.org/package=psych>. Retrived February 24, 2019

135 Tabachnick B.G. & Fidell L. S. (2013). *Using Multivariate Statistics*, 6<sup>th</sup> Ed. Boston: Pearson

136 Wei, T., & Simko, V. (2017). R package "corrplot": Visualization of a Correlation Matrix  
137 (Version 0.84). Available from <https://github.com/taiyun/corrplot>. Retrived February 24,  
138 2019

139 Yalcin, I., & Amemiya, Y. (2001). Nonlinear factor analysis as a statistical method. *Statistical*  
140 *science*, 16(3), 275-294.

141

# SupplementalMaterial

## Section 2. Interpreting R Output from a CFA and EFA.

The resulting output from a CFA or EFA run in R is immense and can feel overwhelming in the beginning. In this annotated output section, we highlight the aspects of the output that we recommend using in Knekta et al. to assess how well the models fit the data. The output is based on the example data set provided in the Supplemental Materials for this paper titled “EFAexampledata.csv” as well as the example R syntax provided (“EFAexampledata.R”). The data in the example dataset is modeled after the real dataset used in the paper but is smaller, so values will not be identical to that in the paper.

### Key to annotation:

*Blue text in Courier New font:* The syntax input used to return this output in R.

*Black text in Courier New font:* R output returned.

*Red boxes:* the pieces of the output we recommend focusing on to interpret a CFA or EFA.

*Text beginning with \* and in Times New Roman Font:* Notes on our interpretation of the output highlighted in the red boxes as well as explanations to help the reader interpret the output.

### A. Confirmatory factor analysis output

```
CFA2<- 'Self =~ go1 + go2 + go3 + go4 + go5 + go6 + go7 + go8 + go9 +
go10 + go11 + go12 + go13 + go14
Other =~ go15 + go16 + go17 + go18 + go19 + go20 + go21 + go22 + go23'

C2f_fit <- cfa(CFA2, estimator = "mlr", missing = "fiml", data= data)

summary(C2f_fit, fit.measures=TRUE, standardized=TRUE, rsquare=TRUE)
```

```
lavaan (0.5-23.1097) converged normally after 36 iterations
```

|                                 |         |         |
|---------------------------------|---------|---------|
| Number of observations          | 365     |         |
| Number of missing patterns      | 1       |         |
| Estimator                       | ML      | Robust  |
| Minimum Function Test Statistic | 879.302 | 712.881 |
| Degrees of freedom              | 229     | 229     |
| P-value (Chi-square)            | 0.000   | 0.000   |
| Scaling correction factor       |         | 1.233   |
| for the Yuan-Bentler correction |         |         |

\* This is the chi-squared test of model fit. Significance indicates the data do not fit the model. For this and the rest of the model fit statistics, we focus on the robust results column (labeled “Robust”) rather than the maximum likelihood results column (“ML”). The robust tests account for the non-normality and non-linearity that we observed when we examined our raw data (see Supplemental Materials Section 1 for what to look for in raw data before running a factor analysis).

48 Model test baseline model:  
 49  
 50 Minimum Function Test Statistic 3651.000 2899.963  
 51 Degrees of freedom 253 253  
 52 P-value 0.000 0.000

53  
 54 User model versus baseline model:  
 55  
 56 Comparative Fit Index (CFI) 0.809 0.817  
 57 Tucker-Lewis Index (TLI) 0.789 0.798  
 58  
 59 Robust Comparative Fit Index (CFI) 0 821

60  
 61 \*CFI measures whether the current model fits the data better than a model assuming no relationships  
 62 between the observed variables. In our case, this incremental fit index is less than the .95 cutoff,  
 63 indicating a lack of fit.

64  
 65 Robust Tucker-Lewis Index (TLI) 0.802

66  
 67 Loglikelihood and Information Criteria:

68  
 69 Loglikelihood user model (H0) -12800.248 -12800.248  
 70 Scaling correction factor 1.276  
 71 for the MLR correction  
 72 Loglikelihood unrestricted model (H1) -12360.598 -12360.598  
 73 Scaling correction factor 1.244  
 74 for the MLR correction  
 75  
 76 Number of free parameters 70 70  
 77 Akaike (AIC) 25740.497 25740.497  
 78 Bayesian (BIC) 26013.490 26013.490  
 79 Sample-size adjusted Bayesian (BIC) 25791.409 25791.409

80  
 81 Root Mean Square Error of Approximation:

82  
 83 RMSEA 0.088 0.076  
 84 90 Percent Confidence Interval 0.082 0.094 0.070 0.082  
 85 P-value RMSEA <= 0.05 0.000 0.000

86  
 87 Robust RMSEA 0.085  
 88 90 Percent Confidence Interval 0.078 0.092

89  
 90 \*RMSEA is a parsimony adjusted fit index. It measures how closely the model reproduces the actual  
 91 observed data patterns. More complex models (in this case, models with more factors) will, by their  
 92 nature, more closely match the observed data, but that does not necessarily increase the model's  
 93 predictive ability. To account for this issue, RMSEA introduces a penalty for model complexity. In this  
 94 case, RMSEA exceeds the 0.06 cut off and the 90% confidence interval is also bounded away from  
 95 0.06. Together, these measures indicate a lack of fit.

96  
 97 Standardized Root Mean Square Residual:

98  
 99 SRMR 0.080 0.080

101 \*SRMR is an absolute fit index. SRMR is the average difference between the sample variances and  
 102 covariances and the model estimated variances and covariances(i.e. the average correlation residuals  
 103 which appears later in this output). In our case, it indicates adequate fit as it just meets the .08 cut off.

104  
 105 Parameter Estimates:

106  
 107 Information Observed  
 108 Standard Errors Robust.huber.white

109 Latent Variables<sup>1</sup>:

|          | Estimate | Std.Err | z-value | P(> z ) | Std.lv | Std.all |
|----------|----------|---------|---------|---------|--------|---------|
| Self =~  |          |         |         |         |        |         |
| go1      | 1.000    |         |         |         | 0.938  | 0.617   |
| go2      | 1.087    | 0.089   | 12.162  | 0.000   | 1.020  | 0.665   |
| go3      | 0.671    | 0.088   | 7.660   | 0.000   | 0.630  | 0.611   |
| go4      | 0.418    | 0.083   | 5.047   | 0.000   | 0.392  | 0.406   |
| go5      | 1.093    | 0.090   | 12.103  | 0.000   | 1.026  | 0.646   |
| go6      | 0.669    | 0.109   | 6.128   | 0.000   | 0.628  | 0.534   |
| go7      | 0.822    | 0.118   | 6.949   | 0.000   | 0.772  | 0.566   |
| go8      | 0.953    | 0.084   | 11.320  | 0.000   | 0.894  | 0.600   |
| go9      | 0.922    | 0.122   | 7.564   | 0.000   | 0.865  | 0.596   |
| go10     | 0.554    | 0.083   | 6.637   | 0.000   | 0.519  | 0.547   |
| go11     | 0.698    | 0.085   | 8.216   | 0.000   | 0.655  | 0.471   |
| go12     | 0.692    | 0.095   | 7.308   | 0.000   | 0.649  | 0.561   |
| go13     | 0.564    | 0.089   | 6.310   | 0.000   | 0.529  | 0.511   |
| go14     | 0.785    | 0.088   | 8.876   | 0.000   | 0.736  | 0.474   |
| Other =~ |          |         |         |         |        |         |
| go15     | 1.000    |         |         |         | 0.978  | 0.869   |
| go16     | 1.091    | 0.059   | 18.623  | 0.000   | 1.067  | 0.795   |
| go17     | 1.110    | 0.060   | 18.628  | 0.000   | 1.085  | 0.800   |
| go18     | 0.809    | 0.079   | 10.280  | 0.000   | 0.791  | 0.577   |
| go19     | 0.687    | 0.079   | 8.732   | 0.000   | 0.672  | 0.540   |
| go20     | 1.037    | 0.068   | 15.192  | 0.000   | 1.014  | 0.754   |
| go21     | 0.998    | 0.052   | 19.256  | 0.000   | 0.976  | 0.840   |
| go22     | 0.650    | 0.091   | 7.135   | 0.000   | 0.636  | 0.417   |
| go23     | 0.928    | 0.088   | 10.532  | 0.000   | 0.908  | 0.466   |

138 \*The above section focuses on the factors specified by the researcher.For each factor (*Self* and *Other*)  
 139 we are given information about how each individual item (go1 – go23) is associated with the factor we  
 140 have specified that it should represent (i.e. the factor loading). The first column (Estimate) is the factor  
 141 loadingfor each item. This is either estimated by the model or fixed.Notice that under each factor the  
 142 first item has an estimate of 1. These items are fixed to 1 by the researcher or by the CFA program. This  
 143 is done to give the factor an interpretable scale. Thefactor loading can be interpreted similarlyto  
 144 regression coefficients: for each unit increase in the appropriatefactor (*Self* or *Other*), the model predicts  
 145 an estimated increase in the specific item. For example, a one-unit increase in *Self* predicts a 1.087

<sup>1</sup> In the main paper we refer to the latent variables as constructs



146 increase in go2. The values are in the original metric of the item used to set the scale, so values greater  
 147 than 1.00 have stronger relationships to the latent variable than the reference item, and weaker  
 148 otherwise. The next column (Std.err) is the standard error of this estimate for each parameter.

149 The third and fourth columns are related to the Wald test ( $Z$ -value and  $P(z > |z|)$ ), which tests  
 150 whether the value of the factor loading is significantly different from zero and, thus, actually contributes  
 151 to the factor. If an item does not contribute to the factor, this indicates the item is not working well in the  
 152 specified model.

153 The final two columns are only printed because we set standardized=TRUE in the initial model.  
 154 These columns are standardized factor loadings. In the first column (Std.lv) only the factors (*Self* and  
 155 *Other*) were standardized. In the second column (Std.all) both the factors and the items themselves are  
 156 standardized. This second column is the one we focus on and is probably the most easily interpretable  
 157 column in this entire table. Since the factor loadings in the Std.all column are standardized, the values are  
 158 bounded between -1 and 1. On the *Self*-factor items, we see that the factor explains more of go5 than it  
 159 does of go10.

161 Covariances:

|         | Estimate | Std.Err | z-value | P(> z ) | Std.lv | Std.all |
|---------|----------|---------|---------|---------|--------|---------|
| Self ~~ |          |         |         |         |        |         |
| Other   | 0.320    | 0.072   | 4.430   | 0.000   | 0.349  | 0.349   |

166 \* The Covariance table measures the degrees to which two variables in the model relate to one another.  
 167 In our case, we are testing to what degree the factors are correlated with one another. The positive  
 168 covariance tells us that as one factor increases in value so does the other. It is the default in the CFA  
 169 command for the factors to be allowed to covary. Std.all tells us the strength of the correlation between  
 170 the two factors. This correlation is at the latent level. This means that if a researcher used the mean  
 171 values from each item to calculate summed scores for the *Self* and the *Other* factor, and we correlated  
 172 these two summed scores, then the resulting value would not be 0.349. Instead, 0.349 is an “error-free”  
 173 correlation, as the measurement errors in the items for each factor is removed in the factor analysis  
 174 process.

176 Intercepts:

|       | Estimate | Std.Err | z-value | P(> z ) | Std.lv | Std.all |
|-------|----------|---------|---------|---------|--------|---------|
| .go1  | 4.159    | 0.080   | 52.289  | 0.000   | 4.159  | 2.737   |
| .go2  | 4.825    | 0.080   | 60.092  | 0.000   | 4.825  | 3.145   |
| .go3  | 6.214    | 0.054   | 115.240 | 0.000   | 6.214  | 6.032   |
| .go4  | 6.274    | 0.051   | 124.083 | 0.000   | 6.274  | 6.495   |
| .go5  | 4.595    | 0.083   | 55.289  | 0.000   | 4.595  | 2.894   |
| .go6  | 5.795    | 0.061   | 94.248  | 0.000   | 5.795  | 4.933   |
| .go7  | 5.510    | 0.071   | 77.277  | 0.000   | 5.510  | 4.045   |
| .go8  | 4.455    | 0.078   | 57.114  | 0.000   | 4.455  | 2.989   |
| .go9  | 5.159    | 0.076   | 67.912  | 0.000   | 5.159  | 3.555   |
| .go10 | 6.367    | 0.050   | 128.164 | 0.000   | 6.367  | 6.708   |
| .go11 | 5.258    | 0.073   | 72.233  | 0.000   | 5.258  | 3.781   |
| .go12 | 5.830    | 0.061   | 96.185  | 0.000   | 5.830  | 5.035   |
| .go13 | 6.082    | 0.054   | 112.194 | 0.000   | 6.082  | 5.872   |
| .go14 | 4.584    | 0.081   | 56.374  | 0.000   | 4.584  | 2.951   |
| .go15 | 6.126    | 0.059   | 104.005 | 0.000   | 6.126  | 5.444   |
| .go16 | 5.932    | 0.070   | 84.446  | 0.000   | 5.932  | 4.420   |

|     |       |       |       |        |       |       |       |
|-----|-------|-------|-------|--------|-------|-------|-------|
| 194 | .go17 | 5.742 | 0.071 | 80.867 | 0.000 | 5.742 | 4.233 |
| 195 | .go18 | 5.460 | 0.072 | 76.056 | 0.000 | 5.460 | 3.981 |
| 196 | .go19 | 5.858 | 0.065 | 89.979 | 0.000 | 5.858 | 4.710 |
| 197 | .go20 | 5.523 | 0.070 | 78.410 | 0.000 | 5.523 | 4.104 |
| 198 | .go21 | 6.060 | 0.061 | 99.656 | 0.000 | 6.060 | 5.216 |
| 199 | .go22 | 4.866 | 0.080 | 61.045 | 0.000 | 4.866 | 3.195 |
| 200 | .go23 | 4.562 | 0.102 | 44.725 | 0.000 | 4.562 | 2.341 |
| 201 | Self  | 0.000 |       |        |       | 0.000 | 0.000 |
| 202 | Other | 0.000 |       |        |       | 0.000 | 0.000 |
| 203 |       |       |       |        |       |       |       |

204 \*The Intercepts table of a CFA tell us the expected value for an item when the all the predictors are 0. In  
 205 our model, the factor (*Other* or *Self*) is the only predictor for each item and it is standardized so that 0 is  
 206 the mean value for the factor. Thus, the intercept estimate (column 1) for each item is simply the mean  
 207 value for each item on the raw scale. We can, for example, see that most students seem to find success  
 208 (item go10) to be important for themselves (Estimate = 6.367 were 7 = very important).

209 Variances:

|           | Estimate | Std.Err | z-value | P(> z ) | Std.lv | Std.all |
|-----------|----------|---------|---------|---------|--------|---------|
| 211 .go1  | 1.429    | 0.134   | 10.698  | 0.000   | 1.429  | 0.619   |
| 212 .go2  | 1.313    | 0.145   | 9.056   | 0.000   | 1.313  | 0.558   |
| 213 .go3  | 0.664    | 0.082   | 8.097   | 0.000   | 0.664  | 0.626   |
| 214 .go4  | 0.779    | 0.091   | 8.588   | 0.000   | 0.779  | 0.835   |
| 215 .go5  | 1.469    | 0.130   | 11.280  | 0.000   | 1.469  | 0.583   |
| 216 .go6  | 0.986    | 0.090   | 10.971  | 0.000   | 0.986  | 0.715   |
| 217 .go7  | 1.260    | 0.123   | 10.234  | 0.000   | 1.260  | 0.679   |
| 218 .go8  | 1.422    | 0.126   | 11.273  | 0.000   | 1.422  | 0.640   |
| 219 .go9  | 1.359    | 0.124   | 10.988  | 0.000   | 1.359  | 0.645   |
| 220 .go10 | 0.631    | 0.068   | 9.218   | 0.000   | 0.631  | 0.701   |
| 221 .go11 | 1.505    | 0.149   | 10.069  | 0.000   | 1.505  | 0.778   |
| 222 .go12 | 0.920    | 0.096   | 9.570   | 0.000   | 0.920  | 0.686   |
| 223 .go13 | 0.793    | 0.091   | 8.701   | 0.000   | 0.793  | 0.739   |
| 224 .go14 | 1.871    | 0.166   | 11.280  | 0.000   | 1.871  | 0.775   |
| 225 .go15 | 0.310    | 0.047   | 6.622   | 0.000   | 0.310  | 0.245   |
| 226 .go16 | 0.662    | 0.091   | 7.312   | 0.000   | 0.662  | 0.368   |
| 227 .go17 | 0.663    | 0.079   | 8.348   | 0.000   | 0.663  | 0.360   |
| 228 .go18 | 1.256    | 0.118   | 10.647  | 0.000   | 1.256  | 0.667   |
| 229 .go19 | 1.095    | 0.107   | 10.212  | 0.000   | 1.095  | 0.708   |
| 230 .go20 | 0.782    | 0.103   | 7.592   | 0.000   | 0.782  | 0.432   |
| 231 .go21 | 0.398    | 0.058   | 6.873   | 0.000   | 0.398  | 0.295   |
| 232 .go22 | 1.915    | 0.164   | 11.707  | 0.000   | 1.915  | 0.826   |
| 233 .go23 | 2.973    | 0.211   | 14.105  | 0.000   | 2.973  | 0.783   |
| 234 Self  | 0.880    | 0.156   | 5.646   | 0.000   | 1.000  | 1.000   |
| 235 Other | 0.957    | 0.127   | 7.561   | 0.000   | 1.000  | 1.000   |

237  
 238 \*The variance table represents the error variance or the amount of the actual scores on the items that are  
 239 not predicted by the model we entered. From the Wald test columns (z-value; p>|z|) we see that the  
 240 factors do not perfectly predict the observed values; the estimated residual variance is significantly  
 241 different from zero for all items and factors. This is expected and does not indicate whether a model is a  
 242 good fit to the data. This variance table is related to the R<sup>2</sup> table below (1 – the standardized error  
 243 variance = R<sup>2</sup>).

|     |           |          |
|-----|-----------|----------|
| 244 | R-Square: |          |
| 245 |           | Estimate |
| 246 | go1       | 0.381    |
| 247 | go2       | 0.442    |
| 248 | go3       | 0.374    |
| 249 | go4       | 0.165    |
| 250 | go5       | 0.417    |
| 251 | go6       | 0.285    |
| 252 | go7       | 0.321    |
| 253 | go8       | 0.360    |
| 254 | go9       | 0.355    |
| 255 | go10      | 0.299    |
| 256 | go11      | 0.222    |
| 257 | go12      | 0.314    |
| 258 | go13      | 0.261    |
| 259 | go14      | 0.225    |
| 260 | go15      | 0.755    |
| 261 | go16      | 0.632    |
| 262 | go17      | 0.640    |
| 263 | go18      | 0.333    |
| 264 | go19      | 0.292    |
| 265 | go20      | 0.568    |
| 266 | go21      | 0.705    |
| 267 | go22      | 0.174    |
| 268 | go23      | 0.217    |
| 269 |           |          |

270 \*R<sup>2</sup> are the standardized factor loadings squared. It demonstrates how much of the variance in the item  
 271 can be explained by the factor. R<sup>2</sup> can also be calculated by subtracting the standardized error variance in  
 272 the previous table from 1. Most of the R<sup>2</sup> values in the proposed model are below the .5 cutoff indicating  
 273 that the factors are not responsible for explaining a majority of the variance in many of the items.  
 274 Instead, unmodeled factors or measurement error are contributing most the responses to these items.  
 275 This hints at the potentially poor fit of the model to the data.  
 276

277

```
278 C2f_mods <- modificationIndices(C2f_fit, minimum.value = 2)  
279 C2f_mods
```

|     | lhs | op       | rhs  | mi     | mi.scaled | epc    | sepc.lv | sepc.all | sepc.nox |
|-----|-----|----------|------|--------|-----------|--------|---------|----------|----------|
| 281 |     |          |      |        |           |        |         |          |          |
| 282 | 75  | Self ==  | go15 | 9.931  | 8.051     | -0.133 | -0.125  | -0.111   | -0.111   |
| 283 | 78  | Self ==  | go18 | 12.252 | 9.933     | 0.260  | 0.244   | 0.178    | 0.178    |
| 284 | 79  | Self ==  | go19 | 11.878 | 9.630     | 0.238  | 0.223   | 0.179    | 0.179    |
| 285 | 82  | Self ==  | go22 | 25.703 | 20.838    | 0.458  | 0.430   | 0.282    | 0.282    |
| 286 | 86  | Other == | go3  | 10.575 | 8.574     | 0.168  | 0.164   | 0.160    | 0.160    |
| 287 | 87  | Other == | go4  | 10.318 | 8.366     | 0.174  | 0.170   | 0.176    | 0.176    |
| 288 | 92  | Other == | go9  | 5.092  | 4.128     | -0.166 | -0.162  | -0.112   | -0.112   |
| 289 | 94  | Other == | go11 | 3.002  | 2.434     | -0.131 | -0.128  | -0.092   | -0.092   |
| 290 | 95  | Other == | go12 | 2.038  | 1.653     | 0.086  | 0.084   | 0.072    | 0.072    |
| 291 | 96  | Other == | go13 | 5.579  | 4.523     | 0.131  | 0.128   | 0.123    | 0.123    |
| 292 | 97  | Other == | go14 | 7.289  | 5.909     | 0.228  | 0.223   | 0.144    | 0.144    |
| 293 | 98  | go1 ==   | go2  | 7.044  | 5.711     | 0.217  | 0.217   | 0.093    | 0.093    |
| 294 | 99  | go1 ==   | go3  | 6.633  | 5.377     | -0.146 | -0.146  | -0.093   | -0.093   |
| 295 | 100 | go1 ==   | go4  | 5.738  | 4.652     | -0.141 | -0.141  | -0.096   | -0.096   |
| 296 | 101 | go1 ==   | go5  | 9.203  | 7.461     | 0.260  | 0.260   | 0.108    | 0.108    |
| 297 | 102 | go1 ==   | go6  | 10.373 | 8.410     | -0.218 | -0.218  | -0.122   | -0.122   |
| 298 | 103 | go1 ==   | go7  | 6.774  | 5.492     | -0.201 | -0.201  | -0.097   | -0.097   |
| 299 | 104 | go1 ==   | go8  | 25.390 | 20.584    | 0.417  | 0.417   | 0.184    | 0.184    |
| 300 | 107 | go1 ==   | go11 | 8.741  | 7.086     | 0.245  | 0.245   | 0.116    | 0.116    |
| 301 | 108 | go1 ==   | go12 | 4.518  | 3.663     | -0.140 | -0.140  | -0.080   | -0.080   |
| 302 | 109 | go1 ==   | go13 | 10.880 | 8.820     | -0.200 | -0.200  | -0.127   | -0.127   |
| 303 | 110 | go1 ==   | go14 | 8.639  | 7.004     | 0.271  | 0.271   | 0.115    | 0.115    |
| 304 | 112 | go1 ==   | go16 | 3.133  | 2.540     | 0.101  | 0.101   | 0.049    | 0.049    |
| 305 | 114 | go1 ==   | go18 | 3.523  | 2.856     | 0.140  | 0.140   | 0.067    | 0.067    |
| 306 | 117 | go1 ==   | go21 | 2.933  | 2.378     | -0.078 | -0.078  | -0.044   | -0.044   |
| 307 | 118 | go1 ==   | go22 | 4.731  | 3.836     | 0.198  | 0.198   | 0.086    | 0.086    |
| 308 | 121 | go2 ==   | go4  | 2.560  | 2.075     | -0.092 | -0.092  | -0.062   | -0.062   |
| 309 | 122 | go2 ==   | go5  | 6.633  | 5.378     | 0.216  | 0.216   | 0.089    | 0.089    |
| 310 | 123 | go2 ==   | go6  | 6.720  | 5.448     | -0.171 | -0.171  | -0.095   | -0.095   |
| 311 | 124 | go2 ==   | go7  | 7.116  | 5.769     | -0.201 | -0.201  | -0.096   | -0.096   |
| 312 | 125 | go2 ==   | go8  | 28.156 | 22.827    | 0.429  | 0.429   | 0.188    | 0.188    |
| 313 | 126 | go2 ==   | go9  | 5.633  | 4.567     | -0.187 | -0.187  | -0.084   | -0.084   |
| 314 | 128 | go2 ==   | go11 | 2.760  | 2.237     | 0.134  | 0.134   | 0.063    | 0.063    |
| 315 | 129 | go2 ==   | go12 | 14.905 | 12.084    | -0.248 | -0.248  | -0.140   | -0.140   |
| 316 | 131 | go2 ==   | go14 | 6.452  | 5.231     | 0.229  | 0.229   | 0.096    | 0.096    |
| 317 | 132 | go2 ==   | go15 | 2.809  | 2.277     | 0.068  | 0.068   | 0.039    | 0.039    |
| 318 | 133 | go2 ==   | go16 | 6.706  | 5.437     | -0.143 | -0.143  | -0.070   | -0.070   |
| 319 | 134 | go2 ==   | go17 | 8.116  | 6.580     | -0.158 | -0.158  | -0.076   | -0.076   |
| 320 | 136 | go2 ==   | go19 | 3.113  | 2.524     | 0.119  | 0.119   | 0.062    | 0.062    |
| 321 | 139 | go2 ==   | go22 | 5.673  | 4.600     | 0.210  | 0.210   | 0.090    | 0.090    |
| 322 | 141 | go3 ==   | go4  | 7.149  | 5.796     | 0.107  | 0.107   | 0.108    | 0.108    |
| 323 | 142 | go3 ==   | go5  | 10.436 | 8.461     | -0.188 | -0.188  | -0.115   | -0.115   |
| 324 | 147 | go3 ==   | go10 | 22.689 | 18.395    | 0.176  | 0.176   | 0.180    | 0.180    |
| 325 | 148 | go3 ==   | go11 | 8.474  | 6.870     | -0.164 | -0.164  | -0.114   | -0.114   |
| 326 | 150 | go3 ==   | go13 | 9.302  | 7.542     | 0.126  | 0.126   | 0.118    | 0.118    |
| 327 | 151 | go3 ==   | go14 | 4.455  | 3.612     | -0.133 | -0.133  | -0.083   | -0.083   |
| 328 | 154 | go3 ==   | go17 | 3.546  | 2.875     | 0.073  | 0.073   | 0.052    | 0.052    |
| 329 | 158 | go3 ==   | go21 | 2.288  | 1.855     | 0.047  | 0.047   | 0.039    | 0.039    |
| 330 | 159 | go3 ==   | go22 | 8.479  | 6.874     | -0.180 | -0.180  | -0.115   | -0.115   |
| 331 | 161 | go4 ==   | go5  | 3.272  | 2.652     | -0.109 | -0.109  | -0.071   | -0.071   |
| 332 | 164 | go4 ==   | go8  | 8.908  | 7.222     | -0.175 | -0.175  | -0.122   | -0.122   |
| 333 | 165 | go4 ==   | go9  | 13.774 | 11.167    | -0.212 | -0.212  | -0.152   | -0.152   |

|     |     |      |    |      |        |        |        |        |        |        |
|-----|-----|------|----|------|--------|--------|--------|--------|--------|--------|
| 334 | 167 | go4  | ~~ | go11 | 7.773  | 6.302  | -0.164 | -0.164 | -0.122 | -0.122 |
| 335 | 168 | go4  | ~~ | go12 | 6.147  | 4.984  | 0.116  | 0.116  | 0.104  | 0.104  |
| 336 | 169 | go4  | ~~ | go13 | 54.431 | 44.129 | 0.317  | 0.317  | 0.317  | 0.317  |
| 337 | 170 | go4  | ~~ | go14 | 2.243  | 1.818  | 0.098  | 0.098  | 0.066  | 0.066  |
| 338 | 176 | go4  | ~~ | go20 | 5.893  | 4.778  | -0.106 | -0.106 | -0.082 | -0.082 |
| 339 | 177 | go4  | ~~ | go21 | 2.491  | 2.020  | 0.052  | 0.052  | 0.046  | 0.046  |
| 340 | 179 | go4  | ~~ | go23 | 5.924  | 4.802  | 0.199  | 0.199  | 0.105  | 0.105  |
| 341 | 180 | go5  | ~~ | go6  | 3.031  | 2.457  | -0.121 | -0.121 | -0.065 | -0.065 |
| 342 | 181 | go5  | ~~ | go7  | 6.877  | 5.576  | -0.207 | -0.207 | -0.096 | -0.096 |
| 343 | 182 | go5  | ~~ | go8  | 12.149 | 9.849  | 0.296  | 0.296  | 0.125  | 0.125  |
| 344 | 184 | go5  | ~~ | go10 | 3.951  | 3.204  | -0.111 | -0.111 | -0.073 | -0.073 |
| 345 | 185 | go5  | ~~ | go11 | 8.248  | 6.687  | 0.243  | 0.243  | 0.110  | 0.110  |
| 346 | 187 | go5  | ~~ | go13 | 4.928  | 3.995  | -0.137 | -0.137 | -0.084 | -0.084 |
| 347 | 188 | go5  | ~~ | go14 | 3.174  | 2.573  | 0.168  | 0.168  | 0.068  | 0.068  |
| 348 | 190 | go5  | ~~ | go16 | 3.122  | 2.531  | 0.103  | 0.103  | 0.048  | 0.048  |
| 349 | 192 | go5  | ~~ | go18 | 3.991  | 3.236  | 0.152  | 0.152  | 0.070  | 0.070  |
| 350 | 194 | go5  | ~~ | go20 | 11.001 | 8.919  | -0.206 | -0.206 | -0.096 | -0.096 |
| 351 | 196 | go5  | ~~ | go22 | 2.100  | 1.702  | 0.135  | 0.135  | 0.056  | 0.056  |
| 352 | 197 | go5  | ~~ | go23 | 6.798  | 5.512  | 0.302  | 0.302  | 0.098  | 0.098  |
| 353 | 198 | go6  | ~~ | go7  | 42.154 | 34.176 | 0.408  | 0.408  | 0.255  | 0.255  |
| 354 | 199 | go6  | ~~ | go8  | 11.473 | 9.302  | -0.228 | -0.228 | -0.130 | -0.130 |
| 355 | 200 | go6  | ~~ | go9  | 13.840 | 11.221 | 0.244  | 0.244  | 0.143  | 0.143  |
| 356 | 203 | go6  | ~~ | go12 | 18.879 | 15.306 | 0.233  | 0.233  | 0.171  | 0.171  |
| 357 | 205 | go6  | ~~ | go14 | 4.820  | 3.908  | -0.165 | -0.165 | -0.090 | -0.090 |
| 358 | 215 | go7  | ~~ | go8  | 9.807  | 7.951  | -0.240 | -0.240 | -0.118 | -0.118 |
| 359 | 216 | go7  | ~~ | go9  | 41.792 | 33.883 | 0.484  | 0.484  | 0.245  | 0.245  |
| 360 | 219 | go7  | ~~ | go12 | 11.982 | 9.714  | 0.211  | 0.211  | 0.134  | 0.134  |
| 361 | 221 | go7  | ~~ | go14 | 4.255  | 3.450  | -0.177 | -0.177 | -0.083 | -0.083 |
| 362 | 222 | go7  | ~~ | go15 | 3.497  | 2.835  | -0.072 | -0.072 | -0.047 | -0.047 |
| 363 | 224 | go7  | ~~ | go17 | 2.692  | 2.183  | 0.087  | 0.087  | 0.047  | 0.047  |
| 364 | 231 | go8  | ~~ | go9  | 2.949  | 2.390  | -0.138 | -0.138 | -0.064 | -0.064 |
| 365 | 232 | go8  | ~~ | go10 | 4.025  | 3.263  | -0.108 | -0.108 | -0.077 | -0.077 |
| 366 | 233 | go8  | ~~ | go11 | 6.937  | 5.624  | 0.216  | 0.216  | 0.104  | 0.104  |
| 367 | 234 | go8  | ~~ | go12 | 18.283 | 14.823 | -0.279 | -0.279 | -0.162 | -0.162 |
| 368 | 235 | go8  | ~~ | go13 | 5.027  | 4.076  | -0.135 | -0.135 | -0.087 | -0.087 |
| 369 | 244 | go8  | ~~ | go22 | 4.331  | 3.511  | 0.188  | 0.188  | 0.083  | 0.083  |
| 370 | 245 | go8  | ~~ | go23 | 2.083  | 1.689  | 0.163  | 0.163  | 0.056  | 0.056  |
| 371 | 248 | go9  | ~~ | go12 | 4.600  | 3.729  | 0.137  | 0.137  | 0.081  | 0.081  |
| 372 | 250 | go9  | ~~ | go14 | 2.752  | 2.231  | -0.148 | -0.148 | -0.066 | -0.066 |
| 373 | 260 | go10 | ~~ | go11 | 5.012  | 4.063  | 0.121  | 0.121  | 0.092  | 0.092  |
| 374 | 263 | go10 | ~~ | go14 | 13.809 | 11.195 | -0.224 | -0.224 | -0.152 | -0.152 |
| 375 | 264 | go10 | ~~ | go15 | 2.027  | 1.643  | -0.039 | -0.039 | -0.036 | -0.036 |
| 376 | 265 | go10 | ~~ | go16 | 3.131  | 2.538  | -0.066 | -0.066 | -0.052 | -0.052 |
| 377 | 266 | go10 | ~~ | go17 | 3.748  | 3.039  | 0.073  | 0.073  | 0.056  | 0.056  |
| 378 | 271 | go10 | ~~ | go22 | 3.398  | 2.755  | -0.110 | -0.110 | -0.076 | -0.076 |
| 379 | 272 | go10 | ~~ | go23 | 4.284  | 3.473  | -0.154 | -0.154 | -0.083 | -0.083 |
| 380 | 273 | go11 | ~~ | go12 | 7.847  | 6.362  | -0.183 | -0.183 | -0.114 | -0.114 |
| 381 | 274 | go11 | ~~ | go13 | 4.098  | 3.323  | -0.122 | -0.122 | -0.085 | -0.085 |
| 382 | 276 | go11 | ~~ | go15 | 2.301  | 1.866  | -0.063 | -0.063 | -0.041 | -0.041 |
| 383 | 279 | go11 | ~~ | go18 | 2.162  | 1.753  | 0.110  | 0.110  | 0.058  | 0.058  |
| 384 | 285 | go12 | ~~ | go13 | 3.819  | 3.096  | 0.093  | 0.093  | 0.078  | 0.078  |
| 385 | 299 | go13 | ~~ | go17 | 3.973  | 3.221  | -0.083 | -0.083 | -0.059 | -0.059 |
| 386 | 303 | go13 | ~~ | go21 | 6.188  | 5.017  | 0.083  | 0.083  | 0.069  | 0.069  |
| 387 | 312 | go14 | ~~ | go21 | 3.079  | 2.496  | -0.090 | -0.090 | -0.050 | -0.050 |
| 388 | 315 | go15 | ~~ | go16 | 7.860  | 6.372  | 0.093  | 0.093  | 0.062  | 0.062  |
| 389 | 317 | go15 | ~~ | go18 | 14.049 | 11.390 | -0.150 | -0.150 | -0.097 | -0.097 |
| 390 | 318 | go15 | ~~ | go19 | 11.616 | 9.417  | -0.126 | -0.126 | -0.090 | -0.090 |
| 391 | 320 | go15 | ~~ | go21 | 6.249  | 5.066  | 0.070  | 0.070  | 0.054  | 0.054  |

|     |     |      |    |      |        |        |        |        |        |        |
|-----|-----|------|----|------|--------|--------|--------|--------|--------|--------|
| 392 | 321 | go15 | ~~ | go22 | 8.762  | 7.103  | -0.142 | -0.142 | -0.083 | -0.083 |
| 393 | 323 | go16 | ~~ | go17 | 27.980 | 22.684 | 0.228  | 0.228  | 0.125  | 0.125  |
| 394 | 324 | go16 | ~~ | go18 | 3.858  | 3.128  | -0.105 | -0.105 | -0.057 | -0.057 |
| 395 | 325 | go16 | ~~ | go19 | 2.528  | 2.050  | -0.079 | -0.079 | -0.047 | -0.047 |
| 396 | 326 | go16 | ~~ | go20 | 16.611 | 13.467 | -0.183 | -0.183 | -0.102 | -0.102 |
| 397 | 327 | go16 | ~~ | go21 | 4.849  | 3.931  | -0.078 | -0.078 | -0.050 | -0.050 |
| 398 | 330 | go17 | ~~ | go18 | 2.623  | 2.127  | -0.087 | -0.087 | -0.047 | -0.047 |
| 399 | 331 | go17 | ~~ | go19 | 5.968  | 4.838  | -0.122 | -0.122 | -0.072 | -0.072 |
| 400 | 333 | go17 | ~~ | go21 | 14.082 | 11.417 | -0.133 | -0.133 | -0.085 | -0.085 |
| 401 | 334 | go17 | ~~ | go22 | 16.086 | 13.042 | -0.260 | -0.260 | -0.126 | -0.126 |
| 402 | 335 | go17 | ~~ | go23 | 2.624  | 2.127  | 0.132  | 0.132  | 0.050  | 0.050  |
| 403 | 336 | go18 | ~~ | go19 | 67.086 | 54.389 | 0.524  | 0.524  | 0.307  | 0.307  |
| 404 | 337 | go18 | ~~ | go20 | 4.391  | 3.560  | 0.119  | 0.119  | 0.064  | 0.064  |
| 405 | 339 | go18 | ~~ | go22 | 8.182  | 6.633  | 0.240  | 0.240  | 0.115  | 0.115  |
| 406 | 340 | go18 | ~~ | go23 | 11.225 | 9.101  | -0.351 | -0.351 | -0.131 | -0.131 |
| 407 | 343 | go19 | ~~ | go22 | 38.132 | 30.915 | 0.481  | 0.481  | 0.254  | 0.254  |
| 408 | 345 | go20 | ~~ | go21 | 3.718  | 3.014  | 0.071  | 0.071  | 0.045  | 0.045  |

409

410 \*This call requests modification indices. Modification indices help the user diagnose why the model  
 411 may not fit the data well. The modification index is actually a measure of how much the chi-squared  
 412 value of the model (this was the very first fit index examined in this output) would change if the  
 413 additional element suggested were added to the model. This does not mean a researcher should actually  
 414 blindly add these elements, but instead, the indices should be used as indicators of model misfit. In  
 415 general, larger modification indices (mi column) should be examined first.

416 The modification indices above are of two types: either (1) specifying an additional factor  
 417 loading ('=~') or (2) correlating the errors between two items ('~~'). For the additional factor loadings,  
 418 the name of the factor is on the left, with the item on the right. In our model specification, this would  
 419 mean that the item on the right should correlate on *both* the *Self* and *Other* factors, indicating that the  
 420 other factor explains some of the variances in the response to that item. The suggested correlated errors  
 421 signal that these items share common variance apart from the factor they are on or across the two factors.  
 422 There are several possible reasons that items may be related to one another: order of presentation,  
 423 similar wording, nearly identical content, or just plain measurement error. While all of these reasons are  
 424 important to understand, what can be most helpful is examining *sets* of items that covary together. For  
 425 example in our model go18 (working with people) and go19 (connecting with others) covary beyond  
 426 what is expected by the model. On average they have a higher correlation than other items on the same  
 427 subscale have to each other. The modification indices tell us that correlating the errors of these two items  
 428 would reduce the chi-squared value by 67.086. This can indicate either the presence of a separate factor  
 429 or a more nuanced, fine-grained distinction present in the overall factor.

430 Overall, we have a lot of large modification indices for this CFA, suggesting our model did not  
 431 fit the data. This might indicate that two subscales are not sufficient or that our data structure does not  
 432 match the assumptions of a CFA.

433

434

435

```
436 residuals(C2f_fit, type = "cor")$cor
```

```

437
438
439
440
441
442
443
444
445
446
447
448
449
450
451
452
453
454
455
456
457
458
459
460

```

|      | go1    | go2    | go3    | go4    | go5    | go6    | go7    | go8    | go9    | go10   | go11   | go12   | go13  | go14  | go15   | go16   | go17   | go18   | go19   | go20  | go21  | go22  | go23  |
|------|--------|--------|--------|--------|--------|--------|--------|--------|--------|--------|--------|--------|-------|-------|--------|--------|--------|--------|--------|-------|-------|-------|-------|
| go1  | 0.000  |        |        |        |        |        |        |        |        |        |        |        |       |       |        |        |        |        |        |       |       |       |       |
| go2  | 0.072  | 0.000  |        |        |        |        |        |        |        |        |        |        |       |       |        |        |        |        |        |       |       |       |       |
| go3  | -0.075 | -0.003 | 0.000  |        |        |        |        |        |        |        |        |        |       |       |        |        |        |        |        |       |       |       |       |
| go4  | -0.084 | -0.053 | 0.095  | 0.000  |        |        |        |        |        |        |        |        |       |       |        |        |        |        |        |       |       |       |       |
| go5  | 0.084  | 0.067  | -0.091 | -0.061 | 0.000  |        |        |        |        |        |        |        |       |       |        |        |        |        |        |       |       |       |       |
| go6  | -0.103 | -0.077 | 0.013  | 0.023  | -0.053 | 0.000  |        |        |        |        |        |        |       |       |        |        |        |        |        |       |       |       |       |
| go7  | -0.080 | -0.077 | -0.012 | 0.012  | -0.078 | 0.220  | 0.000  |        |        |        |        |        |       |       |        |        |        |        |        |       |       |       |       |
| go8  | 0.150  | 0.147  | -0.003 | -0.107 | 0.099  | -0.111 | -0.099 | 0.000  |        |        |        |        |       |       |        |        |        |        |        |       |       |       |       |
| go9  | -0.026 | -0.066 | -0.022 | -0.134 | 0.005  | 0.122  | 0.205  | -0.052 | 0.000  |        |        |        |       |       |        |        |        |        |        |       |       |       |       |
| go10 | -0.021 | -0.030 | 0.151  | 0.027  | -0.060 | 0.014  | -0.012 | -0.065 | 0.035  | 0.000  |        |        |       |       |        |        |        |        |        |       |       |       |       |
| go11 | 0.100  | 0.052  | -0.099 | -0.113 | 0.093  | -0.040 | -0.029 | 0.091  | -0.043 | 0.082  | 0.000  |        |       |       |        |        |        |        |        |       |       |       |       |
| go12 | -0.066 | -0.112 | 0.034  | 0.093  | -0.030 | 0.148  | 0.114  | -0.136 | 0.068  | 0.014  | -0.101 | 0.000  |       |       |        |        |        |        |        |       |       |       |       |
| go13 | -0.108 | -0.030 | 0.100  | 0.290  | -0.070 | -0.004 | -0.016 | -0.075 | -0.025 | 0.038  | -0.076 | 0.068  | 0.000 |       |        |        |        |        |        |       |       |       |       |
| go14 | 0.099  | 0.080  | -0.071 | 0.061  | 0.058  | -0.081 | -0.074 | 0.019  | -0.057 | -0.135 | -0.009 | -0.011 | 0.025 | 0.000 |        |        |        |        |        |       |       |       |       |
| go15 | -0.082 | -0.049 | 0.058  | 0.110  | -0.075 | -0.074 | -0.085 | -0.099 | -0.113 | -0.091 | -0.118 | 0.015  | 0.062 | 0.087 | 0.000  |        |        |        |        |       |       |       |       |
| go16 | -0.002 | -0.105 | 0.071  | 0.111  | 0.001  | -0.072 | -0.036 | -0.048 | -0.082 | -0.087 | -0.077 | 0.008  | 0.063 | 0.099 | 0.031  | 0.000  |        |        |        |       |       |       |       |
| go17 | -0.034 | -0.102 | 0.123  | 0.087  | -0.044 | -0.066 | 0.014  | -0.057 | -0.064 | 0.008  | -0.050 | 0.034  | 0.017 | 0.095 | 0.015  | 0.081  | 0.000  |        |        |       |       |       |       |
| go18 | 0.119  | 0.061  | 0.125  | 0.168  | 0.128  | 0.002  | 0.049  | 0.021  | 0.014  | 0.076  | 0.073  | 0.135  | 0.135 | 0.118 | -0.065 | -0.045 | -0.037 | 0.000  |        |       |       |       |       |
| go19 | 0.027  | 0.117  | 0.152  | 0.145  | 0.085  | 0.031  | 0.078  | 0.061  | 0.014  | 0.087  | 0.059  | 0.106  | 0.142 | 0.134 | -0.061 | -0.038 | -0.058 | 0.283  | 0.000  |       |       |       |       |
| go20 | -0.024 | -0.015 | 0.114  | 0.034  | -0.091 | 0.005  | -0.003 | -0.014 | -0.059 | 0.006  | -0.036 | 0.077  | 0.080 | 0.094 | -0.004 | -0.071 | 0.011  | 0.054  | 0.007  | 0.000 |       |       |       |
| go21 | -0.070 | -0.054 | 0.114  | 0.142  | -0.042 | -0.045 | -0.019 | -0.063 | -0.093 | -0.034 | -0.090 | 0.037  | 0.122 | 0.043 | 0.023  | -0.029 | -0.048 | 0.024  | 0.009  | 0.029 | 0.000 |       |       |
| go22 | 0.192  | 0.199  | 0.069  | 0.139  | 0.172  | 0.112  | 0.127  | 0.180  | 0.091  | 0.026  | 0.106  | 0.185  | 0.122 | 0.164 | -0.059 | -0.019 | -0.104 | 0.108  | 0.240  | 0.007 | 0.029 | 0.000 |       |
| go23 | -0.015 | 0.056  | 0.067  | 0.181  | 0.104  | 0.016  | -0.021 | 0.056  | -0.025 | -0.070 | -0.055 | 0.011  | 0.012 | 0.125 | -0.006 | 0.006  | 0.041  | -0.122 | -0.046 | 0.004 | 0.004 | 0.044 | 0.000 |

461

462 \*This call requests the correlation residuals. These correlation residuals are presented in the form of a  
463 correlation matrix. They represent the difference between the matrix the model creates and the actual  
464 correlation matrix of the observed data. Large residual between two variables suggests that there is a  
465 relationship not being captured by the model. Specifically, we look for residuals greater than 0.1. These  
466 are plentiful in this matrix, implying that the model is not a good fit to the data. For example, go1 and  
467 go22 (first column of the matrix) have a correlation residual of 0.192.  
468

469

## 470 B. Exploratory Factor Analysis Output

471

```
472 corrplot((efa_cormat), order = "hclust", tl.col='black', tl.cex=.75)
```

473

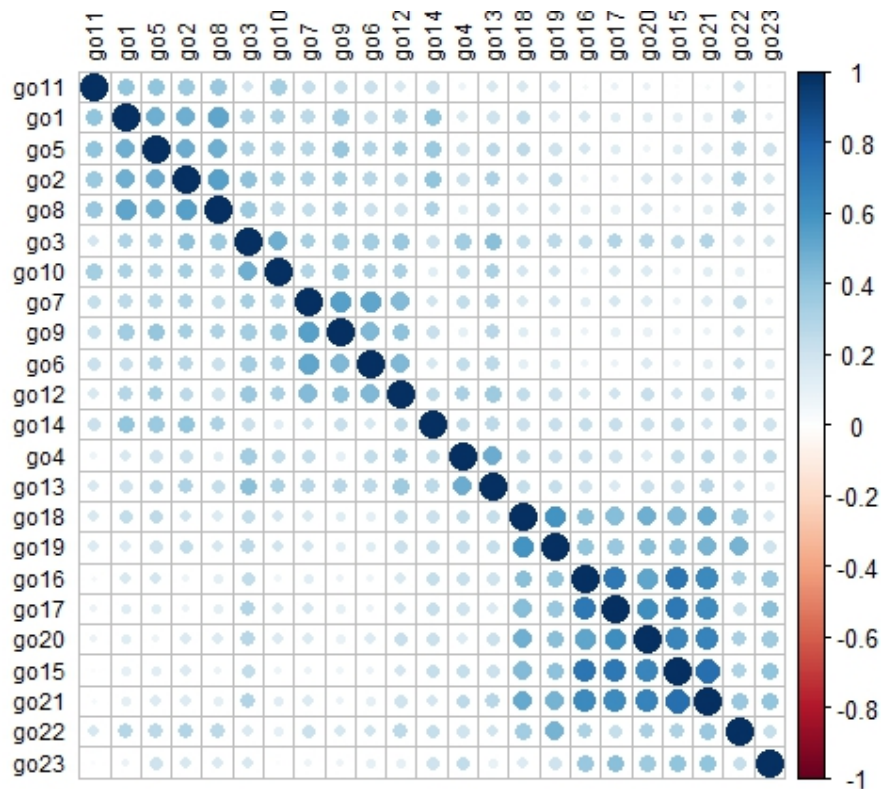

474

475

476 \* There are two methods for looking at the relationships between items in the data. The first is a  
477 traditional correlation matrix, which is not shown here for brevity. The second is a correlation plot  
478 shown above. This plot is easier to use than the correlation matrix because it clusters the items that show  
479 the strongest relationships to each other. This makes it easy to identify potential factors. The size and  
480 intensity of the color of the circle in each square indicated the strength of the relationship between two  
481 items. Looking at this plot there seem to be at least 3 sets of items that are highly correlated with each  
482 other. If a researcher has a small sample size this may be what you use to argue that a survey has or does  
483 not have the same factor structure with your population as it did in earlier published uses of the survey.  
484 With a larger sample size, researchers can continue on to the next steps of the EFA to more confidently  
485 identify the structure of the survey.

486

487



488

489 `fa.parallel(data)`

**Parallel Analysis Scree Plots**

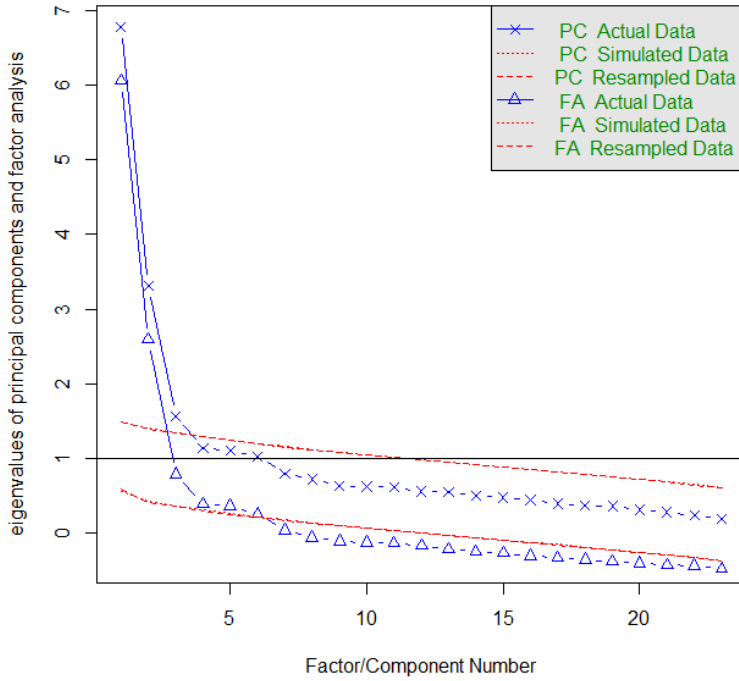

490

491 Parallel analysis suggests that the number of factors = 6 and the number of  
492 components = 3

493

494 \* This command produces a visual scree plot as well as two recommended number of factors to  
495 consider. The plot has a lot of information in it. On the x-axis is a range of possible factors to use in the  
496 model from 0 to over 20. On the y-axis are the eigenvalues for those factors. An eigenvalue is a measure  
497 of how much of the variance of the observed variables a factor explains. In the plot, there are two lines of  
498 connected symbols: triangles and Xs. Each triangle or X is a component/factor. The first represents the  
499 information gained (eigenvalue) by having the first factor. The second is the information gained by  
500 having a second factor and so on. The Xs are the principal components, and the triangles are the factors.  
501 Principal components analysis is usually an item reduction method so will usually yield a lower of  
502 components than the factor analysis. This gives the researcher a reasonable range of factors to test.

503

504 There are multiple strategies for identifying the number of potential factors from this plot. First,  
505 some researchers recommend only retaining factors with an eigenvalue greater than 1 (indicated by  
506 being above the horizontal black line at 1). Factors with an eigenvalue less than one account for a small  
507 proportion of the variability in the dataset and generally do not add as much information to the model.  
508 This is not a hard and fast rule, especially if there are theoretical reasons to consider additional factors.  
509 For instance, if a researcher designed a survey to have three factors and the third is below one but close  
510 to it, the researcher could argue to retain it.

510

511 A second way to evaluate the number of factors is the scree test. This involves looking at the  
shape of the line of triangles or Xs. There is generally a steep curve at the beginning and then a leveling

512 out of the line. A flat line between two factors indicates there is no change information with the addition  
 513 of the new factor, so there is no reason to add that factor. In our plots, there are two inflection points, one  
 514 large one between 4 and 5 factors and then another smaller one between 7 and 8. So, adding a 8<sup>th</sup> factor  
 515 does not add any additional information. This tells us to focus on EFA models with 7 or fewer factors. It  
 516 is also evident from the shape of the plot that there is a lot of information added by the first three factors  
 517 (notice how steep the slope is). This tells us we probably want to consider models with three or more  
 518 factors. So, this suggests we test a series of EFA models with 3 to 7 factors.

519 A final approach is parallel analysis. On the plot, you can see two dotted lines that each cross the  
 520 actual data lines. These dotted lines are simulated data. They are based on the same sample size and  
 521 number of variables as the actual data, but they are randomly generated. Eigenvalues are then repeatedly  
 522 calculated for this random data set. These dotted lines represent the eigenvalues we would expect if  
 523 there were no real relationships between the variables in the dataset. Thus, we only are interested in the  
 524 actual factors with eigenvalues that exceed the eigenvalues you would see from data if relationships  
 525 between variables are simply due to chance. Thus, looking at the plot, we should only keep the factors  
 526 above the red line. In our case parallel analysis suggests three to six factors. A verbal summary of the  
 527 parallel analysis is printed below the figure.

```
528
529 Efa5<-fa(r = efa_cormat,nfactors = 5,rotate = "oblimin",fm = "pa", max.iter = 500)
530 Efa5
531 Factor Analysis using method = pa
532 Call: fa(r = efa_cormat, nfactors = 5, rotate = "oblimin", max.iter = 500,
533 fm = "pa")
```

534 Standardized loadings (pattern matrix) based upon correlation matrix

|          | PA1   | PA2   | PA3   | PA5   | PA4   | h2   | u2   | com |
|----------|-------|-------|-------|-------|-------|------|------|-----|
| 536 go1  | 0.01  | 0.70  | 0.04  | 0.03  | -0.05 | 0.51 | 0.49 | 1.0 |
| 537 go2  | -0.05 | 0.68  | 0.00  | 0.05  | 0.11  | 0.54 | 0.46 | 1.1 |
| 538 go3  | 0.14  | 0.18  | 0.27  | -0.02 | 0.32  | 0.42 | 0.58 | 3.0 |
| 539 go4  | 0.03  | -0.01 | -0.02 | 0.00  | 0.74  | 0.55 | 0.45 | 1.0 |
| 540 go5  | 0.01  | 0.63  | 0.09  | 0.03  | 0.01  | 0.49 | 0.51 | 1.1 |
| 541 go6  | 0.00  | -0.03 | 0.66  | -0.03 | 0.08  | 0.46 | 0.54 | 1.0 |
| 542 go7  | 0.02  | -0.03 | 0.74  | 0.03  | -0.01 | 0.54 | 0.46 | 1.0 |
| 543 go8  | 0.03  | 0.76  | -0.04 | -0.03 | -0.01 | 0.53 | 0.47 | 1.0 |
| 544 go9  | 0.01  | 0.15  | 0.67  | -0.04 | -0.09 | 0.52 | 0.48 | 1.1 |
| 545 go10 | -0.07 | 0.18  | 0.32  | 0.05  | 0.19  | 0.31 | 0.69 | 2.5 |
| 546 go11 | -0.09 | 0.49  | 0.10  | 0.11  | -0.08 | 0.29 | 0.71 | 1.3 |
| 547 go12 | 0.02  | -0.01 | 0.50  | 0.09  | 0.20  | 0.42 | 0.58 | 1.4 |
| 548 go13 | -0.02 | 0.06  | 0.11  | 0.06  | 0.59  | 0.47 | 0.53 | 1.1 |
| 549 go14 | 0.15  | 0.44  | -0.05 | 0.00  | 0.13  | 0.28 | 0.72 | 1.5 |
| 550 go15 | 0.87  | -0.02 | -0.04 | 0.01  | 0.04  | 0.78 | 0.22 | 1.0 |
| 551 go16 | 0.80  | 0.04  | -0.03 | 0.00  | 0.00  | 0.65 | 0.35 | 1.0 |
| 552 go17 | 0.87  | 0.00  | 0.08  | -0.06 | -0.04 | 0.70 | 0.30 | 1.0 |
| 553 go18 | 0.11  | 0.04  | 0.01  | 0.66  | 0.02  | 0.56 | 0.44 | 1.1 |
| 554 go19 | 0.00  | 0.02  | 0.00  | 0.78  | 0.02  | 0.63 | 0.37 | 1.0 |
| 555 go20 | 0.62  | -0.02 | 0.08  | 0.20  | -0.05 | 0.57 | 0.43 | 1.3 |
| 556 go21 | 0.68  | -0.06 | 0.00  | 0.21  | 0.08  | 0.70 | 0.30 | 1.2 |
| 557 go22 | 0.09  | 0.21  | 0.03  | 0.41  | -0.02 | 0.32 | 0.68 | 1.6 |
| 558 go23 | 0.52  | 0.15  | -0.08 | -0.14 | 0.09  | 0.27 | 0.73 | 1.5 |

559

560 \*In this table the rows represent the individual items (go1 – go23) and the first five columns are the  
 561 factors (PA1 – PA5). For each factor and item, a pattern coefficient is provided(similar to factor  
 562 loadings in CFA). Ideally, an item has a high pattern coefficient (close to .8)for one factor and the  
 563 pattern coefficients are close to zero for each of the other factors. In our case, we lookedfor items that  
 564 had a pattern coefficient above 0.40<sup>2</sup> on one factor and not above 0.30 on any other factor. In our  
 565 example, two items (go3 and go10) have low pattern coefficients across all the factors. These items are  
 566 good candidates for removal from our final solution.

567 The next two columns are different ways of looking at how well each item is explained by the  
 568 model. The first (h2) is a measure of communality. Communalityis the proportion of variance in the  
 569 variable that is explained by all the factors in the model. The closer this value is to one, the more the  
 570 variance in the item is explained by the model. The next column is the unique variance (u2) for the  
 571 variable. This is the amount of variance not explained by the latent variables (1- h2). Ideally, items  
 572 would have low uniqueness and high communality. In our example, go11, go14, go23 might be  
 573 candidates for removal because they have a low communality.

574 The final column (com) is not a commonality measure;instead, it is Hoffman’s index of  
 575 complexity. The statistics describe the average number of factors necessary to explain the item. In an  
 576 ideal case this number would be 1, meaning exactly one factor is necessary to explain the item. We can  
 577 see go3, which we saw had similarloadings for several factors, has a high level of complexity indicating  
 578 it needs multiple factors to explain it. This would make it a candidate for removal.

579

|                           | PA1  | PA2  | PA3  | PA5  | PA4  |
|---------------------------|------|------|------|------|------|
| 580 SS loadings           | 3.57 | 2.77 | 2.19 | 1.59 | 1.38 |
| 581 Proportion Var        | 0.16 | 0.12 | 0.10 | 0.07 | 0.06 |
| 582 Cumulative Var        | 0.16 | 0.28 | 0.37 | 0.44 | 0.50 |
| 583 Proportion Explained  | 0.31 | 0.24 | 0.19 | 0.14 | 0.12 |
| 584 Cumulative Proportion | 0.31 | 0.55 | 0.74 | 0.88 | 1.00 |

586

587 \*SS loadings are the sum of squared loadings (pattern coefficients for all items squared and summed for  
 588 a factor). Generally, we consider factors worth saving if they have an SS loading greater than one. In our  
 589 case, all our factors are greater than one.

590 Proportion Var is the proportion of variance in the data explained by a particular factor.The  
 591 higher this number, the more of the variance in the data it explains. We can see, for example, that the  
 592 first factor explains 16% of the variance in the data.The next row, Cumulative Var, is the amount of the  
 593 variance explained by each factor summed. In the first column, it represents just the variance explained  
 594 by PA1. In column two, it is the variance explained by PA1 + PA2 (.16 + .12) and in column three it is  
 595 the variance explained by all three factors and so on. The closer the final column’s value is toone, the  
 596 better the fit of the model to the data.In total 50% of the variance in the data was explained by our  
 597 model.

---

<sup>2</sup> This is a very generous guideline. We used it for the first deletion because we wanted to keep as many items as possible from the original scale. If an item continues to show pattern coefficients below 0.5 over repeated data collections, researchers should consider whether it should be kept in the scale or not.

598 The final two rows examine how the factors contribute to the amount of variance explained.  
599 From Proportion Explained we see the PA1 accounts for 31% of the explained variance, PA2 explains  
600 24% and so on. Cumulative Proportion just sums those values. This will sum to 1 by the last column.  
601  
602

603 With factor correlations of

|     | PA1  | PA2  | PA3  | PA5  | PA4  |
|-----|------|------|------|------|------|
| PA1 | 1.00 | 0.18 | 0.16 | 0.58 | 0.32 |
| PA2 | 0.18 | 1.00 | 0.52 | 0.29 | 0.33 |
| PA3 | 0.16 | 0.52 | 1.00 | 0.25 | 0.39 |
| PA5 | 0.58 | 0.29 | 0.25 | 1.00 | 0.34 |
| PA4 | 0.32 | 0.33 | 0.39 | 0.34 | 1.00 |

604  
605  
606  
607  
608  
609  
610

611 \*This table reveals the correlations between the factors.

612  
613 Mean item complexity = 1.3  
614 Test of the hypothesis that 5 factors are sufficient.

615  
616 The degrees of freedom for the null model are 253 and the objective function was  
617 10

618 The degrees of freedom for the model are 148 and the objective function was 0.86  
619

620 The root mean square of the residuals (RMSR) is 0.03  
621 The df corrected root mean square of the residuals is 0.04

622  
623 Fit based upon off diagonal values = 0.99

624 Measures of factor score adequacy

|     | PA1                                             | PA2  | PA3  | PA5  | PA4  |      |
|-----|-------------------------------------------------|------|------|------|------|------|
| 625 |                                                 |      |      |      |      |      |
| 626 | Correlation of (regression) scores with factors | 0.96 | 0.92 | 0.90 | 0.89 | 0.85 |
| 627 | Multiple R square of scores with factors        | 0.92 | 0.84 | 0.81 | 0.80 | 0.73 |
| 628 | Minimum correlation of possible factor scores   | 0.84 | 0.68 | 0.62 | 0.59 | 0.45 |

629  
630
